1 **Title:**

2 Pulmonary infection interrupts acute cutaneous wound healing through disruption of chemokine  
3 signals

4

5 Short Title: Innate immune triage of two distinct inflammatory sites

6

7 **Authors:** Meredith J. Crane<sup>1§</sup>, Yun Xu<sup>1§</sup>, Sean F. Monaghan<sup>2</sup>, Benjamin M. Hall<sup>2</sup>, Jorge E.  
8 Albina<sup>2</sup>, William L. Henry, Jr.<sup>1</sup>, Holly L. Tran<sup>1</sup>, Karisma R. P. Chhabria, Alexander R. D. Jordon<sup>1</sup>,  
9 Lindsey Carlsen<sup>1</sup>, Amanda M. Jamieson<sup>1\*</sup>

10

11 **Affiliations:**

12 <sup>1</sup>Division of Biology and Medicine, Department of Molecular Microbiology and Immunology,  
13 Brown University, Providence, Rhode Island, United States.

14 <sup>2</sup>Division of Surgical Research, Department of Surgery, Rhode Island Hospital and the Warren  
15 Alpert School of Medicine of Brown University, Providence, Rhode Island, United States.

16 <sup>§</sup>These authors contributed equally.

17 <sup>\*</sup>To whom correspondence should be addressed: [Amanda\\_Jamieson@brown.edu](mailto:Amanda_Jamieson@brown.edu).

18

## 19 **Summary**

20 Studies of the immune response typically focus on single-insult systems, with little known about  
21 how multi-insult encounters are managed. Pneumonia in patients recovering from surgery is a  
22 clinical situation that exemplifies the need for the patient to mount two distinct immune responses.  
23 Examining this, we have determined that poor wound healing is an unreported complication of  
24 pneumonia in laparotomy patients. Using mouse models, we found that lung infection suppressed  
25 the trafficking of innate leukocytes to wounded skin, while pulmonary resistance to the bacterial  
26 infection was maintained. The dual insults caused distinct systemic and local changes to the  
27 inflammatory response, the most striking being a rapid and sustained decrease in chemokine levels  
28 at the wound site of mice with pneumonia. Remarkably, replenishing wound chemokine levels  
29 completely rescued the wound-healing rate in mice with a pulmonary infection. These findings  
30 have broad implications for understanding the mechanisms guiding the innate immune system to  
31 prioritize inflammatory sites.

## 33 **One Sentence Summary**

34 Chemokine-mediated signaling drives the prioritization of innate immune responses to bacterial  
35 pulmonary infection over cutaneous wound healing.

## 37 **Keywords**

38 Wound healing, innate immune response, chemokine, immune cell trafficking, lung infection

## 40 **Highlights**

- 41 • Human laparotomy patients with pneumonia have an increased rate of incision dehiscence,  
42 and this observation can be recapitulated in mouse models of bacterial lung infections and  
43 skin wounds.
- 44 • Lung infection causes rapid and sustained suppression of skin wound chemokine and  
45 inflammatory cytokine production as well as leukocyte recruitment.
- 46 • Unique systemic shifts in the immune compartment occur with two inflammatory insults,  
47 including the cytokine/chemokine signature and the mobilization, recruitment, and  
48 phenotype of innate leukocytes.

- 49 • Restoration of chemokine signaling in the wounds of mice that have a lung infection results  
50 in increased neutrophil trafficking to the wound site and rescues the rate of healing.

51

52 **Graphical Abstract**

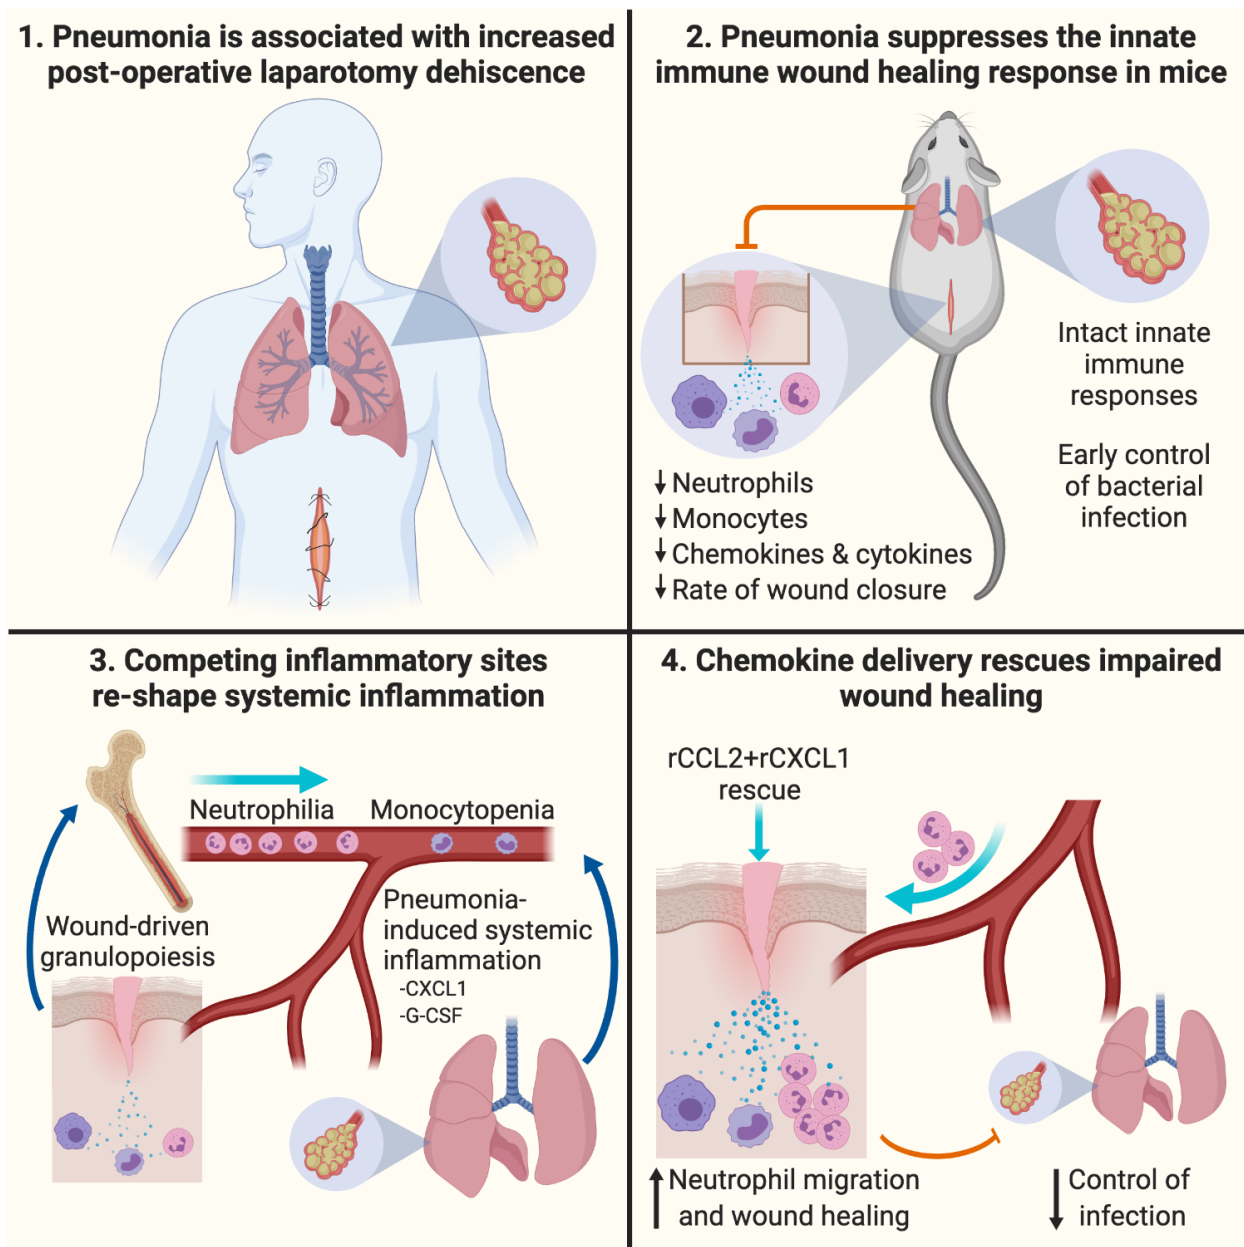

53

54

55

56

## 57 **Introduction**

58 The immune system is essential in many processes that are required to maintain health, ranging  
59 from host-defense, disease tolerance, and the response to cancer, to development,  
60 neurophysiology, metabolism, and tissue repair (1-5). Many of these responses must occur  
61 simultaneously. However, we have a limited understanding of how multi-insult encounters are  
62 managed by the innate immune system, as studies of immune function have classically focused on  
63 single-insult encounters, such as infection or injury. We propose that when faced with more than  
64 one insult, a form of immune triage occurs, where the most life-threatening risk receives the  
65 attention needed to resolve the threat. To examine this, we turned to the example of hospitalized  
66 surgical patients.

67  
68 Post-operative patients in the hospital are at risk of developing secondary healthcare-associated  
69 infections, such as pneumonia, and this occurrence extends the length of hospital stay and increases  
70 the rate of morbidity and mortality (6-8). Patients with traumatic or surgical injuries rely on intact  
71 innate immune responses to drive acute wound healing (9-23). However, the innate immune  
72 response is also essential in preventing and clearing infections, raising the possibility that there  
73 will be increased stress on the immune response during the post-operative recovery period if  
74 complicated by a concurrent infection (9-23). In cases of post-operative pneumonia, it is not known  
75 how these inflammatory sites interact and shape the immune response, and how this may affect  
76 the ability to successfully heal a wound. With a specific focus on the components of the innate  
77 immune system that orchestrate the acute phases of wound healing, including neutrophils,  
78 inflammatory monocytes, macrophages, and an array of inflammatory cytokines and chemokines  
79 (24), we hypothesized that the cellular innate immune response is insufficient to meet the demands  
80 of these dual insults, resulting in the prioritization of one inflammatory site.

81  
82 In order to address our hypothesis, we assessed surgical patient data and established murine models  
83 of post-operative pulmonary infection. We report here a previously unknown increased incidence  
84 of poor wound healing in surgical patients who develop pneumonia. To understand this at a  
85 mechanistic level, we developed mouse models of pulmonary infection following surgical  
86 wounding, focusing on bacterial lung infection because nosocomial pneumonia is most commonly  
87 caused by a variety of bacterial species (25). Recapitulating patient data, lung infection caused

88 delayed cutaneous wound healing in mice. Inflammatory cellular and cytokine responses in the  
89 wound were rapidly suppressed by lung infection, while effects of the two inflamed sites generated  
90 a unique immune signature in the bone marrow and blood. A loss of chemokine signals was the  
91 underlying cause of decreased wound cellularity and poor healing in lung-infected mice, as the  
92 therapeutic application of monocyte and neutrophil chemoattractants to the wound site fully  
93 restored healing. Our findings introduce a mechanistic basis for how the immune system uses  
94 chemokine networks to triage, or prioritize, inflammatory sites.

95

## 96 **Materials and Methods**

97

### 98 *Analysis of surgical patient data*

99 The American College of Surgeons (ACS) National Surgical Quality Improvement Program  
100 (NSQIP) Participant Use Data File (PUF) for 2015 was utilized in this study, 2015 being the most  
101 recent available dataset. The ACS NSQIP PUF is a HIPAA compliant file with no protected health  
102 information that was accessed after approval from ACS NSQIP. For 2015 there were over 885,000  
103 operative cases from 603 hospitals. Trained nurses enter all data in the NSQIP database with the  
104 focus on quality improvement, therefore complications like dehiscence are less likely to be missed  
105 as would be expected in self-reporting situations. All patients with a primary CPT code involving  
106 a laparotomy were included for analysis, regardless of emergent status. These patients were  
107 assessed for a dehiscence after pneumonia based on the postoperative days reported. Age was  
108 compared based upon two groups: 18-40 and >65. This was done to have a buffer age range (41-  
109 64) that would show a true physiologic difference based upon age.

110

### 111 *Mice*

112 All animal studies were approved by the Brown University Institutional Animal Care and Use  
113 Committee and carried out in accordance with the Guide for the Care and Use of Animals of the  
114 National Institutes of Health. The animal protocol (number 1608000222) was approved on  
115 September 26, 2016, and the annual continuation of this protocol was approved on September 28,  
116 2018. C57BL/6J mice were purchased from The Jackson Laboratory. B6.SJL-*Ptprc<sup>a</sup>Pepc<sup>b</sup>*/BoyJ  
117 (CD45.1 congenic) mice were bred in-house. Male mice 8-12 weeks of age were used in all  
118 experiments.

119

120 *Polyvinyl alcohol sponge implantation*

121 Prior to surgeries, mice received intraperitoneal injections of ketamine (60-80 mg/kg) and xylazine  
122 (30-40 mg/kg) to induce anesthesia and analgesia. The dorsum was shaved and cleaned with  
123 povidone-iodine solution and isopropyl alcohol. Under sterile conditions, six 1cm×1cm×0.3cm  
124 sterile PVA sponges (Ivalon, PVA Unlimited, Inc.) were placed into subcutaneous pockets through  
125 a 2cm midline dorsal incision. The incision was then closed with surgical clips.

126

127 *Full-thickness tail wounding*

128 Prior to surgery the tail was cleaned with povidone-iodine solution and isopropyl alcohol. Using a  
129 scalpel, a 1cm x 0.3cm area of the skin was excised 0.5cm from the base of the tail. The wound  
130 bed was then covered with a spray barrier film (Cavilon, 3M). Length and width measurements  
131 were taken at the midpoints of the wound bed using calipers, and these measurements were used  
132 to calculate the wound area. A secondary measurement of wound area on photographed wounds  
133 was analyzed using ImageJ software (NIH). Tail wound images were acquired from a fixed  
134 position using a 12-megapixel iSight camera. All measurements were done in a blinded fashion.

135

136 *Bacterial pulmonary infection*

137 Mice were anesthetized by intraperitoneal injection of ketamine (60-80 mg/kg) and xylazine (30-  
138 40 mg/kg). Mice were given  $2 \times 10^7$  CFU *Klebsiella oxytoca* or  $5 \times 10^6$  CFU *Streptococcus*  
139 *pneumoniae* intranasally in a volume of 30 $\mu$ L, with sterile saline as the vehicle.

140

141 *Wound fluid and cell isolation*

142 Mice were euthanized by CO<sub>2</sub> asphyxiation. To collect wound fluid, three sponges isolated from  
143 the right of midline from each animal were placed in the barrel of a 5mL syringe and centrifuged  
144 in a collection tube. For cell collection, three sponges from the left of midline from each animal  
145 were placed in 1x HBSS medium (1% FBS/penicillin/streptomycin/1M HEPES) and cells were  
146 isolated by mechanical disruption using a Stomacher (Tekmar). Wound cells were washed with 1x  
147 HBSS medium and red blood cells lysed. Cell counts were obtained using a Moxi Z Automated  
148 Cell Counter (Orflo) or an Attune NxT flow cytometer (ThermoFisher).

149

150 *Plasma and blood cell collection*

151 Blood was collected retro-orbitally in the presence of heparin. Plasma was separated from red  
152 blood cells and leukocytes by centrifugation in Wintrobe Tubes (CMSLabcraft). Leukocytes were  
153 contained within the buffy coat layer at the interface of plasma and red blood cells. Residual red  
154 blood cells in the buffy coat layer were removed by lysis. Cells were counted using a Moxi Z  
155 Automated Cell Counter (Orflo) or an Attune NxT Flow Cytometer (ThermoFisher).

156

157 *Bronchoalveolar lavage and lung cell preparation*

158 To collect bronchoalveolar lavage fluid (BALF), a BD Venflon IV catheter was inserted into the  
159 exposed trachea. The catheter was used to flush the bronchoalveolar space twice with 1ml of sterile  
160 1xPBS. Cell-free supernatants were collected for cytokine analyses and protein content  
161 quantification. Cells were counted with a Moxi Z Automated Cell Counter (Orflo) or an Attune  
162 NxT Flow Cytometer (ThermoFisher).

163

164 To isolate cells from lung tissue, the right superior and middle lobes were perfused with 20 ml of  
165 PBS then minced. The tissue was incubated for 45 minutes at 37° C in DMEM containing type 4  
166 collagenase (Worthington Biochemical Corporation) and DNase I (Sigma-Aldrich). The digested  
167 tissue was strained at 70µM. The cell pellet was then re-suspended in 4ml of 40% Percoll/PBS  
168 and carefully layered over 4ml of 80% Percoll/PBS. The gradient was centrifuged at room  
169 temperature for 20 minutes at 600g with low acceleration and deceleration. Cells at the Percoll  
170 gradient interface were collected and washed once with 10ml PBS containing 5% FBS.

171

172 *Pulmonary CFU analysis*

173 The right superior lung lobe was homogenized in sterile 1x PBS. Serial dilutions of homogenates  
174 were plated onto Trypticase Soy Agar with 5% Sheep Blood (TSA II, BD) for quantitation of  
175 colony forming units (CFU).

176

177 *Quantitation of BALF total protein*

178 The bicinchoninic (BCA) assay was used to measure the concentration of protein in the BALF  
179 according to manufacturer instructions (Pierce Chemical Co.). Each sample was tested against an  
180 albumin standard.

181

182 *Flow cytometry analysis of cell subsets*

183 The following antibodies were used to identify cell subsets: Ly6C-FITC (AL-21, BD Biosciences),  
184 F4/80-APC eFluor660 (BM8, eBioscience), Siglec-F-PE or AR700 (E50-2440, BD Biosciences),  
185 CD11c-PE or BV711 (HL3, BioLegend), Ly6G-PerCP eFluor710 or V450 (1A8, eBioscience or  
186 BD Biosciences), CD45.2-APC/Fire750 or V450 (104, BioLegend or eBioscience), CD45.1-PE  
187 (A20, eBioscience), and CD11c-BV711 (N418, BioLegend). Dead cells were excluded from  
188 analyses using Fixable Viability Dye APC BV506 (eBioscience).

189

190 Surface staining: Cells were treated with anti-CD16/CD32 Fc receptor blocking antibody (clone  
191 2.4G2) in 1x PBS (1% FBS) for 10 minutes on ice. Cells were then centrifuged and resuspended  
192 in 1x PBS (1% FBS) containing antibodies and incubated for 15 minutes on ice. Cells were washed  
193 with 1x PBS then incubated with Fixable Viability Dye diluted in 1x PBS for 15 minutes on ice.  
194 Cells were washed, then fixed with 1% paraformaldehyde for 15 minutes on ice.

195

196 Samples were acquired using an Attune NxT Acoustic Focusing Cytometer with Attune Software.  
197 Analyses were performed using FlowJo v10 software (Tree Star, Inc.). Gate placement was  
198 determined using fluorescence minus one and unstained control samples.

199

200 *Cytokine analysis*

201 The concentration of cytokines and chemokines, with the exception of G-CSF, CXCL1 and  
202 CXCL5, in wound fluid, plasma, and BALF was measured using a custom LEGENDplex bead-  
203 based immunoassay (BioLegend) according to manufacturer instructions. G-CSF, CXCL1 and  
204 CXCL5 concentrations were determined using DuoSet sandwich ELISA kits (R&D Systems)  
205 according to manufacturer instructions.

206

207 *Bone marrow cell isolation and adoptive transfer*

208 For immunophenotyping, femurs were collected from C57BL/6J mice in 1x HBSS. For cell  
209 adoptive transfers, femurs and tibias were collected from CD45.1 congenic mice in sterile 1x  
210 HBSS. Bone marrow was collected from femurs and/or tibias by flushing with sterile 1x HBSS  
211 medium (1% FBS/penicillin/streptomycin/1M HEPES) using a syringe and red blood cells were



212 lysed with water under sterile conditions. Isolated cells were counted with a Moxi Z Automated  
213 Cell Counter (Orflo) or an Attune NxT Flow Cytometer (ThermoFisher). For adoptive transfer,  
214  $5 \times 10^6$  bone marrow cells in a volume of 100 $\mu$ L of sterile 1x PBS were transferred retro-  
215 orbitally to recipient wild-type C57BL/6J mice.

216

#### 217 *Application of exogenous chemokines to tail wounds*

218 Fibrin sealant (Tisseel, Baxter) was delivered to the wound bed by co-application of thrombin and  
219 fibrinogen, which were prepared under sterile conditions according to the manufacturer  
220 instructions. The sealer protein protease inhibitor was omitted from the mixture to facilitate  
221 delivery of the recombinant chemokines to the wound bed via fibrin degradation. Directly before  
222 application, recombinant murine CCL2 (Peprotech) and recombinant murine CXCL1 (Peprotech)  
223 were mixed into the fibrinogen component. Control mice were treated with Tisseel without  
224 chemokines. The fibrinogen and thrombin components were maintained at 37°C to avoid  
225 polymerization. Using two pipets, equal volumes of fibrinogen and thrombin were simultaneously  
226 applied to the wound beds of anesthetized mice and allowed to polymerize. Treatments were given  
227 every day from wound days 1 to 7, then every other day for the remainder of the experiment. Each  
228 chemokine treatment contained 10ng of recombinant CCL2 and 10ng of recombinant CXCL1.  
229 Application volumes were adjusted according to wound bed area and ranged from 30 $\mu$ L to 10 $\mu$ L.

230

#### 231 *Application of exogenous chemokines to PVA sponge wounds*

232 Recombinant murine CCL2 (Peprotech) and recombinant murine CXCL1 (Peprotech) were diluted  
233 in 1x PBS for injection into implanted PVA sponges. The backs of mice were cleaned with iodine  
234 solution and isopropyl alcohol. 0.5 $\mu$ g of each chemokine mixed in a total volume of 50 $\mu$ L of PBS  
235 was injected through the skin and into the center of each sponge for a total treatment of 3 $\mu$ g per  
236 wound. Control mice received injections of PBS vehicle. Mice were injected on wound days 5 and  
237 6, and sponges were isolated on wound day 7.

238

#### 239 *Statistical analysis*

240 Biostatistical analyses of murine samples were carried out using the GraphPad Prism software  
241 package. For comparison of two groups the nonparametric Mann Whitney test was used. To  
242 compare 3 or more groups the Kruskal-Wallis one-way analysis of variance or, for data sets with

243 multiple time points, a two-way analysis of variance with Tukey's multiple comparisons test was  
244 used. All the groups were compared to each other. For clarity in murine experiments, only  
245 statistically significant differences between wound + *K. oxytoca* and control, wound, or *K. oxytoca*  
246 groups are presented. Unless otherwise noted, statistically significant changes between control and  
247 wound + *K. oxytoca* are denoted by \*, between wound and wound + *K. oxytoca* are denoted by %, and  
248 between *K. oxytoca* and wound + *K. oxytoca* are denoted by #. Differences were considered  
249 significant if the p value was calculated to be  $\leq 0.05$ . Clinical data were managed and analyzed  
250 using SAS (Cary, NC) using the included generalized linear mixed model and alpha was set to  
251 0.05.

252

## 253 Results

### 254 Pneumonia is associated with wound dehiscence among patients with abdominal incisions.

255

256 While it is well known that pneumonia is a  
257 risk of hospitalization, especially in post-  
258 surgical and trauma patients, it is not known  
259 how pneumonia impacts the ability to heal a  
260 wound (26-30). To address this question, we  
261 consulted the American College of Surgeons (ACS) National Surgical Quality Improvement  
262 Program (NSQIP) Participant Use Data File (PUF) to assess the rate of abdominal incision  
263 dehiscence among patients with or without pneumonia. Dehiscence is a post-surgical complication  
264 in which the wound ruptures along the site of the incision, and it is a clear indicator of a poorly  
265 healing surgical wound. Of over 885,000 cases in the ACS NSQIP PUF for 2015, 89,608 cases  
266 were included as they had a midline abdominal incision. A total of 1221 patients had a dehiscence  
267 (1.4%). When assessing patients who had a dehiscence and pneumonia, the dehiscence rate was  
268 3.16%, compared to a dehiscence rate of 1.28% among patients who did not have pneumonia  
269 ( $p < 0.0001$ , Table 1). Surgical site infection is typically associated with an increased risk of  
270 dehiscence; however, pneumonia did not make it more or less likely to have a surgical site infection  
271 (6.3% vs 6.7%,  $p = 0.2829$ , Supplementary Table 1). Age has also been associated with increased  
272 dehiscence, and in a model to predict dehiscence, both age  $> 65$  ( $F = 8.4$ ,  $p = 0.00037$ ) and pneumonia  
273 ( $F = 59.57$ ,  $p < 0.0001$ ) were significant, but the interaction between the two was not ( $F = 0.51$ ,

Table 1. Rate of abdominal wound dehiscence among surgical patients with pneumonia

| PNEUMONIA    | DEHISCENCE                  |                           | TOTAL |
|--------------|-----------------------------|---------------------------|-------|
|              | No Dehiscence (% of Total)  | Dehiscence (% of Total)   |       |
| No Pneumonia | 84774 (98.72%) <sup>^</sup> | 1103 (1.28%) <sup>^</sup> | 85877 |
| Pneumonia    | 3613 (96.84%) <sup>#</sup>  | 118 (3.16%) <sup>#*</sup> | 3731  |

<sup>^</sup>Percent of total number of patients in "No Pneumonia" group

<sup>#</sup>Percent of total number of patients in "Pneumonia" group

\* $p \leq 0.0001$  versus % dehiscence in "No Pneumonia" group

274

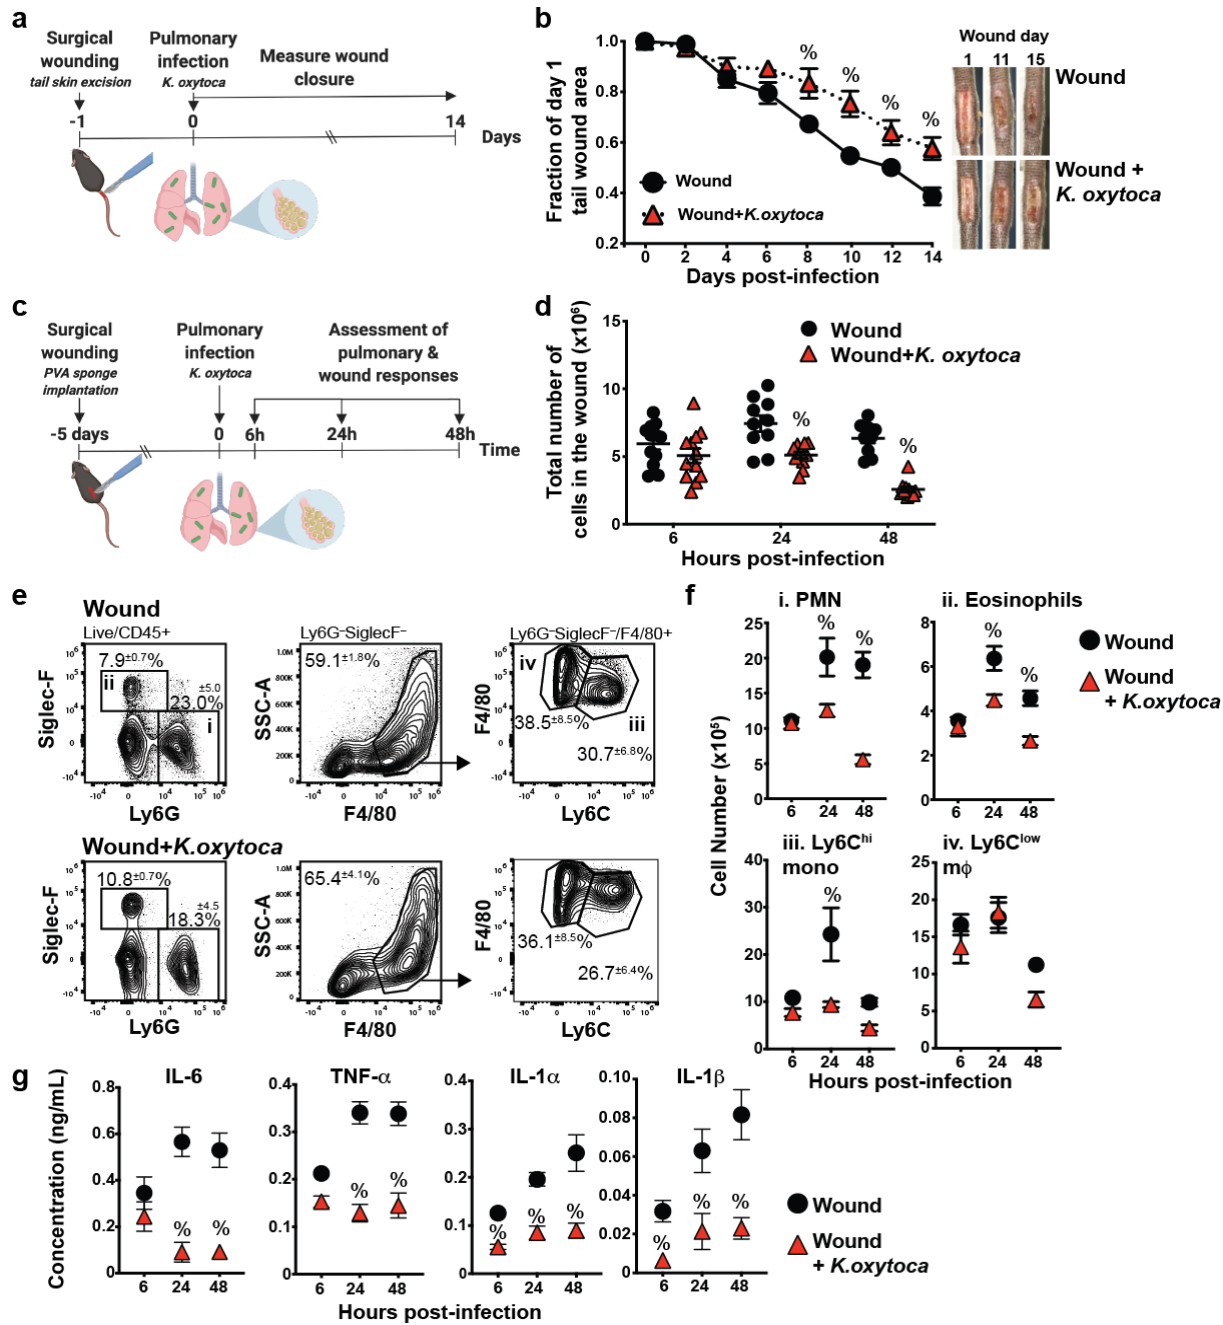

**Fig. 1. Pulmonary *K. oxytoca* infection impairs wound healing.**

**a)** To determine the effect of lung infection on wound closure, excisional tail wounds were performed on C57BL/6J mice (wound), and a cohort was infected intranasally with *K. oxytoca* (wound + *K. oxytoca*) on wound day 1. The tail wound area was measured every other day beginning on day 1.

**b)** Tail wound closure was measured in mice infected with *K. oxytoca* infection and compared to uninfected mice.

**c)** The PVA sponge wound model was used to assess the effects of pulmonary infection on cellular wound healing responses. Sponges were surgically implanted, and a cohort was infected intranasally with *K. oxytoca* (wound + *K. oxytoca*) 5 days later.

**d)** Wound cellularity was assessed 6, 24, and 48h post-infection.

**e)** Flow cytometry analysis of wound cells isolated from uninfected or infected mice 48h post-infection shows the frequency of Ly6G<sup>+</sup> neutrophils (PMN, i), Siglec-F<sup>+</sup> eosinophils (ii), F4/80<sup>+</sup>Ly6C<sup>hi</sup> monocytes (mono, iii), and F4/80<sup>+</sup>Ly6C<sup>low</sup> macrophages (mΦ, iv).

**f)** The absolute number of innate leukocyte populations in wounds of uninfected or *K. oxytoca*-infected mice.

**g)** Wound fluids were assayed by LegendPlex for the proinflammatory cytokines IL-6, TNF-α, IL-1α, and IL-1β.

Data are shown as the mean±SEM with minimum n=10 mice per group from three independent experiments. Results are considered statistically significant when  $p \leq 0.05$ . Statistically significant changes between wound and wound + *K. oxytoca* are denoted by %.

275 p=0.4749). This increased wound dehiscence was also specific for lung infections as another  
276 common hospital-acquired infection, urinary tract infection, did not increase the rate of dehiscence  
277 (Supplemental Table 2). This analysis demonstrates that the onset of pneumonia in patients with  
278 surgical injuries is a risk factor for complications in wound healing.

279

### 280 **Excisional tail skin wound closure is delayed in mice with lung infection.**

281

282 We established murine models to determine the mechanisms of impaired wound healing in  
283 pneumonia patients. To assess the rate of wound closure, a 1cm x 0.3cm excisional tail skin wound  
284 was employed. Tail skin was chosen as the site of wounding because it is firm, lacks fur, and relies  
285 primarily on re-epithelialization, which is more akin to human skin healing than other murine  
286 models of wound closure (31-33). Initial wound area measurements were obtained on day 1 post-  
287 wounding. At this time, mice either remained uninfected or were infected intranasally with the  
288 Gram-negative opportunistic bacterium *Klebsiella oxytoca* (wound + *K. oxytoca*) (34, 35). The  
289 wound area was measured over the course of 15 days, and it is reported as a fraction of the day 1  
290 wound area (Figure 1a). From days 7 to 15 post-wounding, wound + *K. oxytoca* mice had  
291 significantly larger wounds compared to wounded mice alone (Figure 1b, Figure S1). These data  
292 indicate that pulmonary infection causes a delay in tail wound closure.

293

### 294 **Pulmonary *K. oxytoca* infection decreases innate leukocyte cellularity in the wound.**

295

296 Activation of the innate immune system is essential for the early stages of wound healing. To  
297 investigate the effects of pulmonary infection on the acute wound healing response, mice were  
298 wounded by the dorsal subcutaneous implantation of polyvinyl alcohol (PVA) sponges. This  
299 model follows the acute stages of wound healing, and allows for the retrieval of cells and fluids  
300 from the implanted sponges after their removal (10, 11, 16, 20, 33, 36). By 7 days post-sponge  
301 implantation, a large number of leukocytes are recoverable from implanted sponges, and the  
302 cytokine milieu reflects the transition from the inflammatory to the repair phases of wound healing  
303 (10, 11, 16, 20, 36).

304

305 Mice with PVA sponge wounds remained uninfected or were infected intranasally with *K. oxytoca*  
306 (wound + *K. oxytoca*) five days after sponge implantation in order to synchronize the inflammatory  
307 response to infection (Figure S2) with an established acute wound healing leukocyte response (10).  
308 Wound cellularity was assessed 6, 24, and 48 hours after infection (Figure 1c). Beginning at 24  
309 hours post-infection, fewer infiltrating immune cells were isolated from sponges removed from  
310 wound + *K. oxytoca* mice compared to wounded mice alone (Figure 1d). Initiating *K. oxytoca*  
311 infection in wounded mice on wound day 1 similarly led to a decrease in wound cellularity at 24-  
312 and 48-hours post-infection (Figure S3), indicating that this suppression was not specific to the  
313 timing of infection after wounding.

314  
315 The wound leukocyte milieu in uninfected and *K. oxytoca*-infected mice was assessed to determine  
316 whether pulmonary infection altered a specific cell type in the wound. Mice were wounded by  
317 PVA sponge implantation, and a cohort was infected intranasally with *K. oxytoca* on wound day 5  
318 (Figure 1c). Cell populations in the wound were identified by flow cytometry analysis 6, 24, and  
319 48 hours post-infection. CD45<sup>+</sup> innate leukocytes are the predominant cell type in PVA sponge  
320 wounds at these times, and consist primarily of Ly6G<sup>+</sup> neutrophils, Siglec-F<sup>+</sup> eosinophils,  
321 F4/80<sup>+</sup>Ly6C<sup>hi</sup> monocytes, and F4/80<sup>+</sup>Ly6C<sup>low</sup> monocyte-derived macrophages (10, 11, 20).  
322 Representative gating of wound cells 48 hours after infection (wound day 7) is shown in Figure  
323 1e, and the full gating strategy to identify these cell populations is reported in Figure S4. The  
324 relative percentage of neutrophils, monocytes, macrophages, and eosinophils was the same in  
325 wound and wound + *K. oxytoca* groups (Figure 1e). In contrast, the absolute number of all innate  
326 leukocyte populations examined was lower in wound + *K. oxytoca* mice than wounded mice alone  
327 at 24- and 48- hours post-infection, with the exception of F4/80<sup>+</sup>Ly6C<sup>low</sup> macrophages (Figure 1f).  
328 This indicates that the cellularity defect lies primarily with cells that migrate to the wound from  
329 the circulation (37). Together, these data demonstrate that pulmonary infection suppresses the  
330 number of innate leukocytes in the wound, which results in an overall loss of wound cellularity.

331  
332 **Wound cytokines are suppressed in *K. oxytoca*-infected mice.**  
333  
334 Coordinated wound cytokine responses are necessary for the normal progression of the repair  
335 response (10-12, 16, 17, 36, 38). The effect of pulmonary infection on a time course of wound

336 inflammatory cytokine concentrations was assessed in PVA sponge wound fluids from mice that  
337 were treated as shown in Figure 1c. As expected, the cytokines TNF- $\alpha$ , IL-6, IL-1 $\beta$  and IL-1 $\alpha$  were  
338 present in the wound fluid at all time points examined. IL-1 $\beta$  and IL-1 $\alpha$  were suppressed in wound  
339 fluids as soon as 6 hours post-infection. By 24 hours post-infection, wound fluids had lower  
340 concentrations of all cytokines compared to uninfected mice (Figure 1g), demonstrating that  
341 pulmonary infection causes suppression of cytokine responses in PVA sponge wounds.

342

343 **Prior wounding alters the kinetics of pulmonary cytokine and cellular responses but does**  
344 **not impact resistance to *K. oxytoca* infection.**

345

346 In response to *K. oxytoca* infection, inflammatory cytokines and chemokines are rapidly produced  
347 in the lung (21). To determine whether an ongoing wound healing response influenced the ability  
348 to respond to a pulmonary bacterial infection, IL-6, TNF- $\alpha$ , IL-1 $\alpha$ , IL-1 $\beta$ , and GM-CSF levels in  
349 the bronchoalveolar lavage fluid (BALF) were assessed in control, wound, *K. oxytoca*, or wound  
350 + *K. oxytoca* groups (Figure 2a). Mice were wounded and/or infected as previously described  
351 (Figure 1c). *K. oxytoca* infection alone induced all cytokines as early as 6 hours after infection. At  
352 6 hours post-infection, wound + *K. oxytoca* mice had a significantly higher concentration of IL-6  
353 in the BALF than infected mice alone. In contrast, the production of IL-1 $\beta$  and GM-CSF in wound  
354 + *K. oxytoca* mice was delayed compared to infected mice alone. These data indicate that the  
355 presence of a wound alters the initial cytokine response to pulmonary infection.

356

357 To determine if the observed changes in BALF cytokine production in wound + *K. oxytoca* mice  
358 influenced the ability to mount a cellular response to the bacterial pathogen, we examined  
359 leukocyte populations in the BALF. *K. oxytoca* infection caused an increase in BALF cellularity  
360 compared to control mice. A similar increase in BALF cellularity was observed in wound + *K.*  
361 *oxytoca* mice (Figure 2b). The distribution of CD45<sup>+</sup> innate leukocytes in the BALF of control,  
362 wound, *K. oxytoca*, and wound + *K. oxytoca* groups was also determined at 6, 24, and 48 hours  
363 post-infection. Representative flow cytometry analyses from 48 hours post-infection are shown in  
364 Figure 2c, and the full BALF gating strategy is presented in Figure S5. Nearly all cells isolated  
365 from the BALF of uninfected mice were F4/80<sup>+</sup>Ly6C<sup>low</sup>Siglec-F<sup>+</sup> alveolar macrophages, while  
366 Ly6G<sup>+</sup> neutrophils were the predominant innate leukocyte population in *K. oxytoca*-infected mice.

367

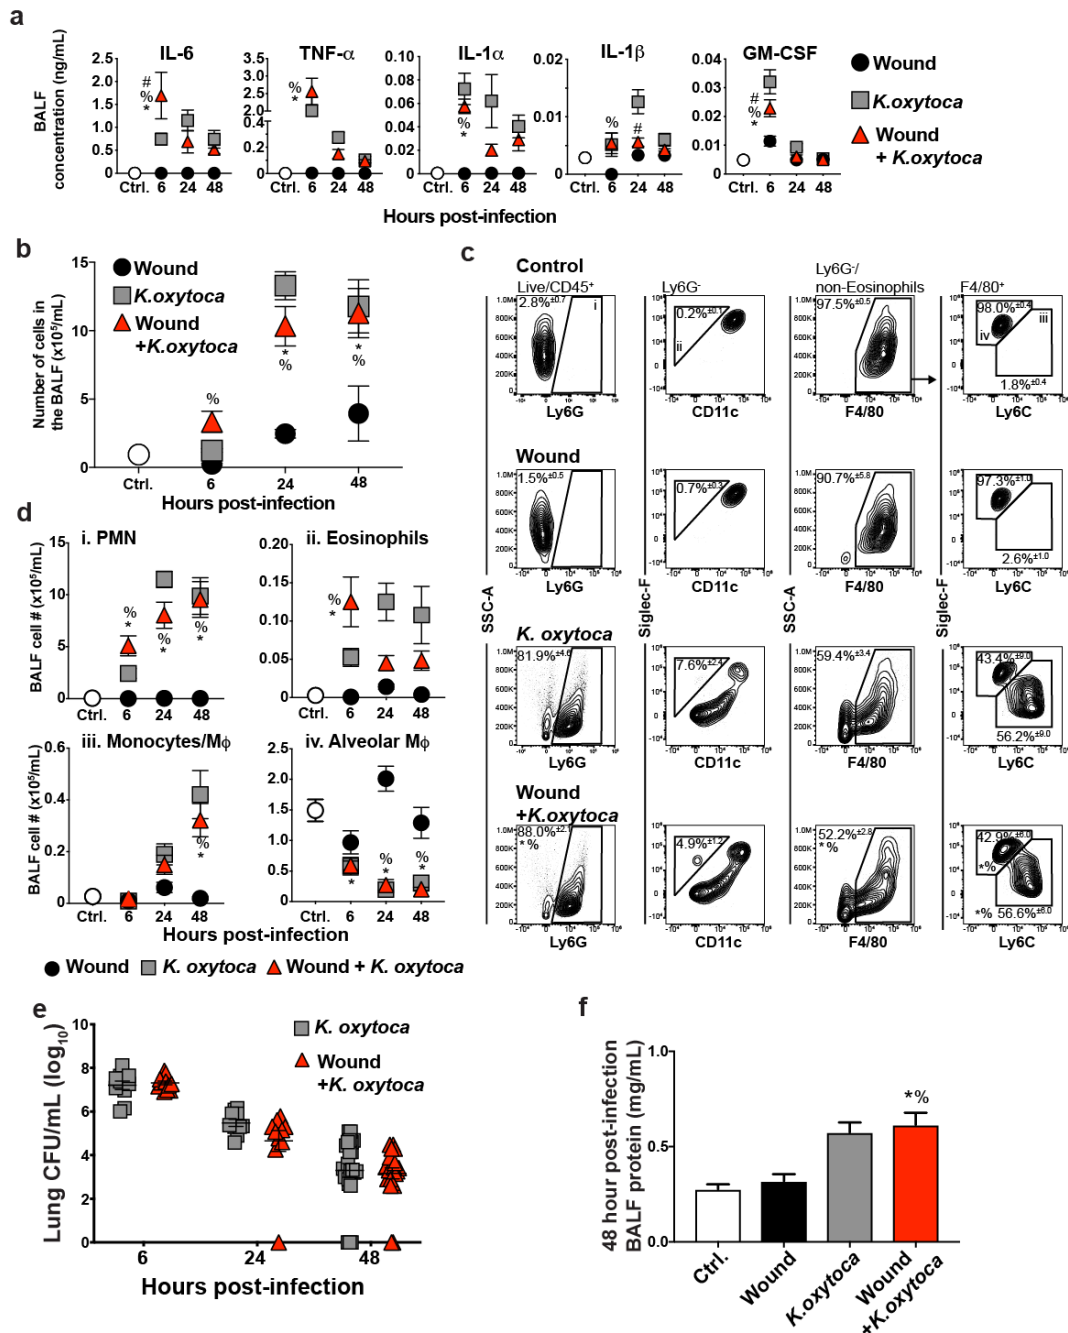

**Fig. 2. PVA sponge wounds alter the pulmonary cellular and cytokine response but not early control of *K. oxytoca* infection.** C57BL/6J mice were wounded by PVA sponge infection (wound), and a cohort was infected 5 days later (wound + *K. oxytoca*). Unwounded mice were also infected with *K. oxytoca* (*K. oxytoca*) or remained uninfected (ctrl.).

**a)** The BALF was assayed with LegendPlex for a panel of cytokines that are induced in response to bacterial infection.

**b)** A time course of BALF cellular content was determined for all experimental groups.

**c)** Flow cytometry analysis shows the proportion of BALF Ly6G<sup>+</sup> neutrophils (PMN, i), CD11c<sup>-</sup>Siglec-F<sup>+</sup> eosinophils (ii), F4/80<sup>+</sup>Ly6C<sup>hi</sup>Siglec-F<sup>-</sup> monocytes/macrophages (m $\phi$ ) (iii), and F4/80<sup>+</sup>Ly6C<sup>low</sup>Siglec-F<sup>+</sup> alveolar macrophages (m $\phi$ ) (iv) at 48h post-infection.

**d)** The absolute number of BALF leukocyte populations over time.

**e)** Lung *K. oxytoca* titers were determined in *K. oxytoca*-infected and wound + *K. oxytoca* mice.

**f)** The BALF protein content at 48h post-infection was measured by BCA assay to assess pulmonary vascular permeability.

Data are shown as the mean $\pm$ SEM with a minimum n=10 mice per group from three independent experiments. Results are considered statistically significant when  $p \leq 0.05$ . Statistically significant changes between control and wound + *K. oxytoca* are denoted by \*, between wound and wound + *K. oxytoca* are denoted by %, and between *K. oxytoca* and wound + *K. oxytoca* are denoted by #.

368 F4/80<sup>+</sup>Siglec-F<sup>low</sup>Ly6C<sup>hi</sup> monocytes/macrophages also accumulated in the BALF of infected mice.  
369 Wounding did not significantly alter the kinetics of the lung-infiltrating leukocytes examined in  
370 infected mice, although the number of Ly6G<sup>+</sup> neutrophils was modestly elevated in the BALF of  
371 wound + *K. oxytoca* mice at 6 hours post-infection (Figure 2d).

372  
373 To determine if the presence of a PVA sponge wound impacted the ability to control the pulmonary  
374 infection, bacterial titers were measured in *K. oxytoca* and wound + *K. oxytoca* groups. *K. oxytoca*  
375 titers were the same in infected mice with or without wounds at all time points examined (Figure  
376 2e). BALF protein content was also measured at 48 hours post-infection to assess pulmonary  
377 vascular permeability in all experimental groups. *K. oxytoca* and wound + *K. oxytoca* mice had  
378 similar increases in BALF protein content after infection compared to uninfected groups (Figure  
379 2f). Overall, these data show that the presence of a wound primes the pulmonary environment for  
380 rapid induction of IL-6 and neutrophil responses; however, this does not impact the ability to  
381 respond to the lung infection or cause excess vascular permeability.

382  
383 To determine whether the suppressive effect of *K. oxytoca* infection on dermal wound healing was  
384 pathogen-specific, or more broadly applicable to other bacterial pulmonary infections, the  
385 experiments described in Figure 1c were repeated using pulmonary infection with the Gram-  
386 positive bacterium *Streptococcus pneumoniae*. As infection with *S. pneumoniae* is lethal after  
387 several days, we focused on the innate immune wound healing response using the PVA sponge  
388 wound model rather than the excisional tail skin wound model (Figure S6a). Similar to what was  
389 observed with *K. oxytoca* infection, wound cellularity was decreased in mice with *S. pneumoniae*  
390 infection, which corresponded to loss of neutrophils, monocytes, and macrophages (Figures S6b,  
391 S6c and S6d). Wound fluid cytokine and chemokine levels were also reduced in mice with  
392 pulmonary *S. pneumoniae* infection (Figure S6e and S6f). Conversely, pulmonary resistance to *S.*  
393 *pneumoniae* infection was not affected by the presence of a wound (Figure S6g). These results  
394 indicate that the prioritization of innate immune responses between wound healing and pulmonary  
395 infection is not pathogen specific.

396  
397  
398



399

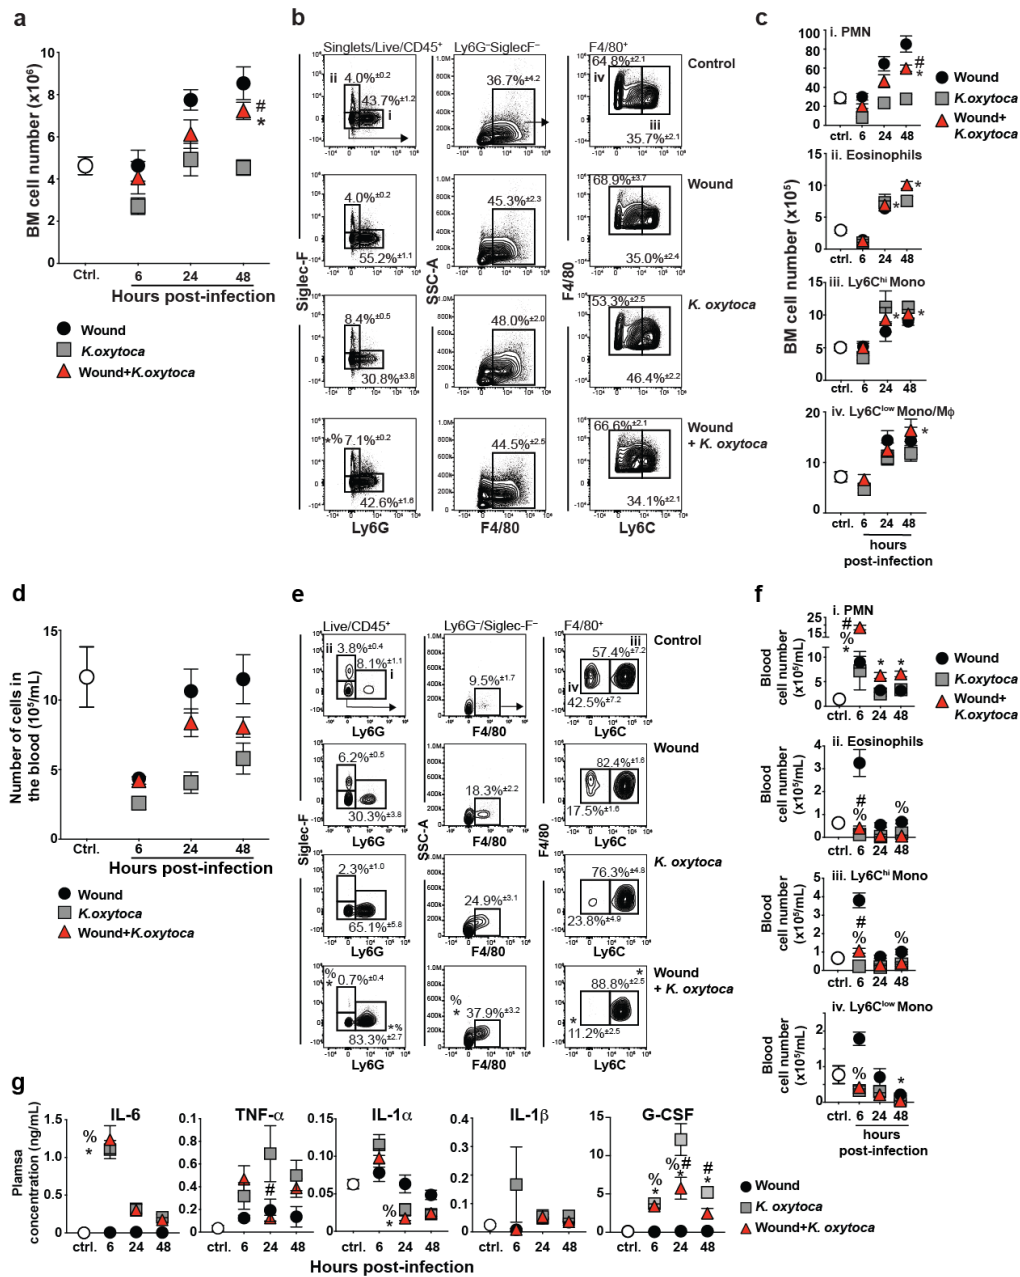

**Fig. 3. *K. oxytoca* infection alters systemic innate leukocyte and cytokine responses in wounded mice.** C57BL/6J mice were wounded by PVA sponge implantation (wound) and a cohort was infected with *K. oxytoca* (wound + *K. oxytoca*) five days later. Additional unwounded mice remained uninfected (control) or were infected intranasally with *K. oxytoca* (*K. oxytoca*).

**a** A time course of showing the total number of cells in the bone marrow (BM). **b** The proportion of bone marrow Ly6G<sup>+</sup> neutrophils (PMN, i), Siglec-F<sup>+</sup> eosinophils (ii), F4/80<sup>+</sup>Ly6C<sup>hi</sup> monocytes (mono, iii), and F4/80<sup>+</sup>Ly6C<sup>low</sup> monocytes/macrophages (mono/mΦ) (iv) was assessed by flow cytometry. Representative analyses from 48h post-infection are shown.

**c** The absolute number of bone marrow leukocytes over time.

**d** A time course of the number of cells per milliliter of blood.

**e** The frequency of blood Ly6G<sup>+</sup> neutrophils (PMN, i), Siglec-F<sup>+</sup> eosinophils (ii), F4/80<sup>+</sup> monocytes, F4/80<sup>+</sup>Ly6C<sup>hi</sup> inflammatory monocytes (mono, iii), and F4/80<sup>+</sup>Ly6C<sup>low</sup> patrolling monocytes (mono, iv), was determined by flow cytometry analysis. Representative gating from 48h post-infection is shown.

**f** The absolute number of blood leukocytes was assessed over time.

**g** A time course of plasma cytokines was determined by LegendPlex assay (IL-6, TNF- $\alpha$ , IL-1 $\alpha$ , and IL-1 $\beta$ ) or ELISA (G-CSF). Data are shown as the mean $\pm$ SEM with minimum n=10 mice per group from three independent experiments. Results are considered statistically significant when  $p \leq 0.05$ . Statistically significant changes between control and wound + *K. oxytoca* are denoted by \*, between wound and wound + *K. oxytoca* are denoted by %, and between *K. oxytoca* and wound + *K. oxytoca* are denoted by #.

400 **Wounds and lung infection together induce a unique systemic inflammatory response.**

401  
402 The bone marrow and circulation are the primary source of monocytes and neutrophils involved  
403 in both wound healing and pulmonary antibacterial defense. With competing inflammatory sites,  
404 it is possible that there is a limited supply of leukocytes in the bone marrow and/or blood.  
405 Therefore, one potential explanation for the decreased cellularity observed in the wounds of wound  
406 + *K. oxytoca* mice is that, because large numbers of leukocytes are allocated to the lung, there are  
407 fewer available cells to respond to the wound. The number of cells recovered from the bone  
408 marrow of wounded, infected, or wound + *K. oxytoca* mice was similar among the three  
409 experimental groups with the exception of 48 hours post-infection, in which *K. oxytoca*-infected  
410 mice had fewer bone marrow cells, perhaps due to increased mobilization (Figure 3a). Assessing  
411 leukocyte populations by flow cytometry analysis, wound and wound + *K. oxytoca* mice had more  
412 neutrophils in the bone marrow than infected mice alone at 24- and 48-hours post-infection. The  
413 other populations examined were similar among the three experimental groups (Figure 3b and  
414 Figure 3c).

415  
416 Examining the blood, all three experimental groups had a decrease in the number of circulating  
417 cells compared to control mice, likely due to margination to the inflamed peripheral sites (Figure  
418 3d). Flow cytometry analysis revealed that wound + *K. oxytoca* mice had significantly more  
419 circulating neutrophils 6 hours post-infection compared to wounded or infected mice alone, and  
420 their levels remained elevated 24- and 48-hours post-infection (Figures 3e, 3f, and S7). In contrast,  
421 circulating eosinophils as well as Ly6C<sup>hi</sup> and Ly6C<sup>low</sup> monocytes were decreased in wound + *K.*  
422 *oxytoca* mice compared to wounded mice alone (Figures 3e and 3f, and Figure S7). This suggests  
423 that, in wound + *K. oxytoca* mice, a limiting systemic supply of Ly6C<sup>hi</sup> monocytes may contribute  
424 to their decline in the wound, while the abundance of circulating neutrophils drives their rapid  
425 accumulation in the BALF.

426  
427 Systemic cytokine levels are important in the activation of immune cells. To assess whether  
428 competing insults altered the balance of systemic cytokines, the plasma concentration of  
429 inflammatory cytokines was measured by ELISA or multiplex bead assay. Mice were wounded by  
430 PVA sponge implantation and/or infected as previously described (Figure 1c). None of the

431 cytokines examined were induced in control or wounded mice at the time points examined. IL-6  
432 was strongly induced 6 hours after *K. oxytoca* infection with no effect of prior wounding. TNF- $\alpha$   
433 was also elevated systemically in mice infected with *K. oxytoca*, but the induction of TNF- $\alpha$  was  
434 transiently suppressed in wound + *K. oxytoca* mice at 24h post-infection. The concentration of IL-  
435 1 $\alpha$  and IL-1 $\beta$  in the plasma of wound + *K. oxytoca* mice followed the pattern observed in infected  
436 mice alone (Figure 3g). G-CSF was rapidly induced in the plasma of all infected groups as early  
437 as 6 hours post-infection. This could explain the increase in blood neutrophil content in wound +  
438 *K. oxytoca* mice, as these mice have both increased bone marrow neutrophil content driven by the  
439 wound response and an infection-induced rise in G-CSF, which regulates neutrophil mobilization  
440 (39-41). Taken together, these data indicate that a deficit in the number of circulating monocytes  
441 contributes to the loss of monocyte cellularity in the wound; in contrast, the abundance of  
442 circulating neutrophils is not consistent with their absence in the wound environment, suggesting  
443 other factors contribute to this phenotype.

444

#### 445 **Fewer leukocytes migrate to the wounds of mice with pulmonary infection.**

446

447 The loss of wound cellularity in wound + *K. oxytoca* mice could stem from a decreased ability of  
448 circulating leukocytes to migrate to the wound site. To test this, a bone marrow cell adoptive  
449 transfer approach was taken. CD45.2<sup>+</sup> C57BL/6J recipient mice were wounded by PVA sponge  
450 implantation, and a cohort was infected intranasally with *K. oxytoca* 5 days later. Twenty-four  
451 hours after infection, bone marrow cells isolated from naive CD45.1 congenic mice were  
452 transferred intravenously to wound or wound + *K. oxytoca* CD45.2<sup>+</sup> recipient mice (Figure 4a).  
453 The fraction of CD45.1<sup>+</sup> donor-derived cells in the wounds of recipient mice was assessed 48 hours  
454 post-infection by flow cytometry analysis. There were fewer CD45.1<sup>+</sup> donor-derived cells by  
455 proportion and total number in the wounds of wound + *K. oxytoca* mice as compared to the wounds  
456 of wounded recipient mice alone (Figure 4b). Similarly, there were significantly fewer donor  
457 derived CD45.1<sup>+</sup> Ly6G<sup>+</sup> neutrophils and F4/80<sup>+</sup>Ly6C<sup>hi</sup> monocytes by proportion and absolute  
458 number in the wounds of wound + *K. oxytoca* recipient mice compared to wounded recipient mice  
459 alone (Figure 4c and 4d). There was only a very small proportion (<0.05%) of  
460 CD45.1<sup>+</sup>F4/80<sup>+</sup>Ly6C<sup>low</sup> macrophages in recipient wounds (Figure 4d); these were likely derived  
461 from monocytes that matured *in situ* after migrating from the circulation (20). Together, these data

462

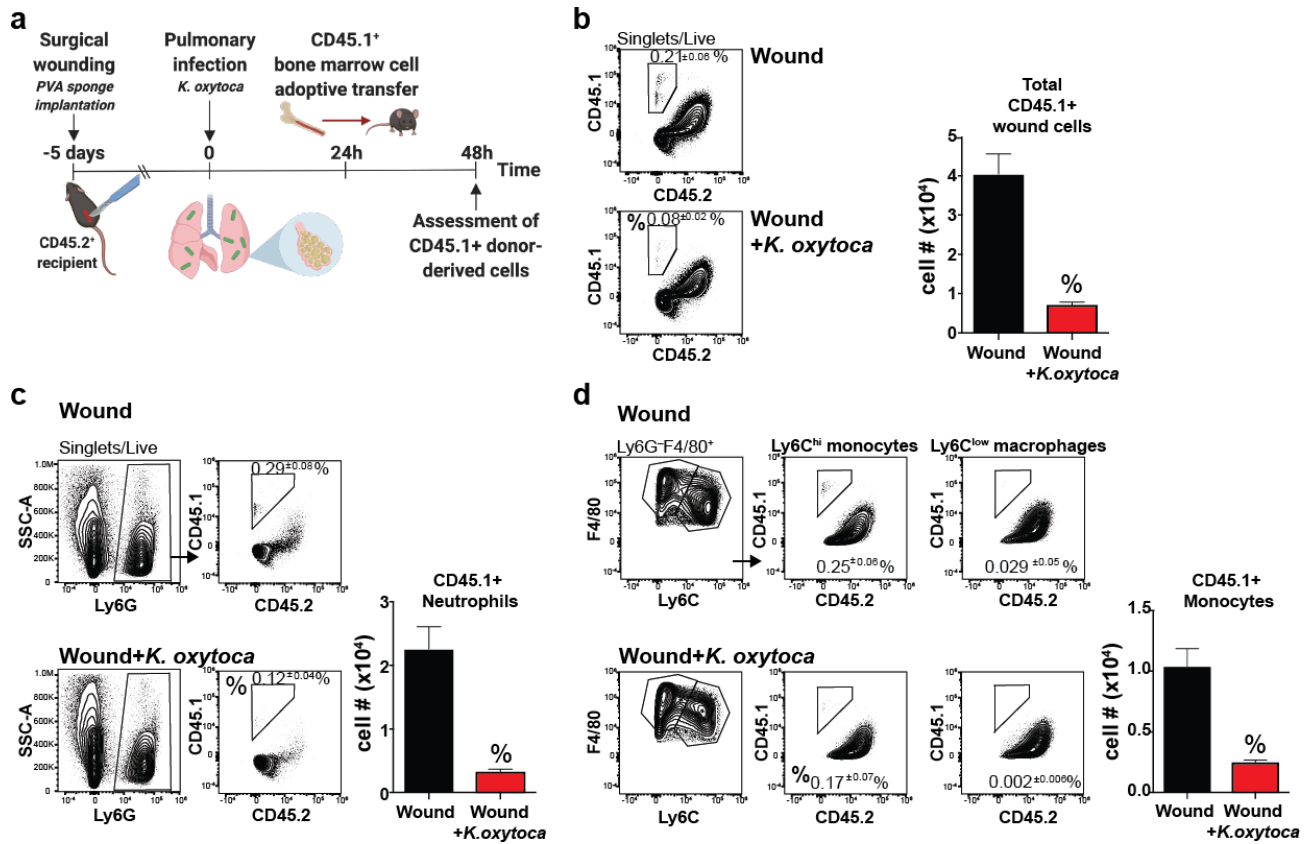

**Fig. 4. Neutrophil and monocyte trafficking to wounds is impaired in mice with pulmonary *K. oxytoca* infection.**

a) Naïve CD45.1<sup>+</sup> congenic bone marrow cells were adoptively transferred to uninfected or *K. oxytoca*-infected mice with PVA sponge wounds.

b) The percentage and number of donor-derived CD45.1<sup>+</sup> cells in the wounds of uninfected and *K. oxytoca*-infected mice, as determined by flow cytometry.

c) The percentage and number of donor-derived CD45.1<sup>+</sup> Ly6G<sup>+</sup> neutrophils in the wounds of uninfected and *K. oxytoca*-infected mice, as determined by flow cytometry.

d) The percentage and number of donor-derived CD45.1<sup>+</sup> F4/80<sup>+</sup> Ly6C<sup>hi</sup> monocytes and the percentage of CD45.1<sup>+</sup> F4/80<sup>+</sup> Ly6C<sup>low</sup> macrophages in the wounds of uninfected and *K. oxytoca*-infected mice, as determined by flow cytometry. The number of macrophages is excluded due to low frequency.

Data are shown as the mean ± SEM with minimum n=12 mice per group from three independent experiments. Results are considered statistically significant when  $p \leq 0.05$ . Statistically significant changes between wound and wound + *K. oxytoca* are denoted by %.

463 indicate that circulating neutrophils and inflammatory monocytes are impaired in their ability to  
464 migrate to wounds in mice with an ongoing *K. oxytoca* infection.

465

#### 466 **Pulmonary infection rapidly suppresses wound chemokine signals.**

467

468 The decrease in the accumulation of adoptively transferred cells to the wounds of infected mice  
469 could be due to a local or systemic imbalance of chemokine signals. To assess this, we examined  
470 the expression of chemokines and chemokine receptors that are important in neutrophil and  
471 monocyte migration to inflamed sites. Mice were wounded and/or infected as previously described  
472 (Figure 1c). The neutrophil chemoattractants CXCL1 and CXCL5 were measured in the wound  
473 fluid, BALF, and plasma of all experimental groups. In the wound fluid, CXCL1 and CXCL5 were  
474 rapidly suppressed within 6 hours of *K. oxytoca* infection and never recovered to the levels  
475 measured in wounded mice alone at the time points examined (Figure 5a). CXCL1 was induced in  
476 the BALF and the plasma in response to *K. oxytoca* infection. Interestingly, CXCL1 concentrations  
477 were suppressed in both of these compartments in wound + *K. oxytoca* mice compared to infected  
478 mice alone at one or more time points. While CXCL5 was high in the plasma of all experimental  
479 groups, it was induced only by infection in the BALF (Figure 5b and c).

480

481 A similar rapid and sustained reduction of the monocyte chemoattractant CCL2 was observed in  
482 the wound fluid within 6 hours post-infection (Figure 5d). As with CXCL1 and CXCL5, this  
483 suppression of wound fluid CCL2 expression preceded the reduction in wound cellularity, which  
484 began at 24 hours post-infection (Figure 1). In the BALF and the plasma, CCL2 levels were highest  
485 in infected groups, peaking at 48- and 6- hours post-infection, respectively (Figure 5e and f).

486

487 Inflammation can alter the phenotype of innate leukocytes, which may have functional  
488 consequences at the tissue level. In the steady state, neutrophils in the circulation are  
489 phenotypically mature and express high levels of the marker CD101, while inflammation can lead  
490 to the release of CD101<sup>low</sup> neutrophils from the bone marrow that are immature and functionally  
491 distinct (40). Mice were wounded and infected as described above (Figure 1c), and neutrophils  
492 from the wound, BALF, and blood were examined for expression of CD101 expression and  
493 CXCR2, the receptor for CXCL1 and CXCL5 (42). The neutrophils that were recruited to the

494

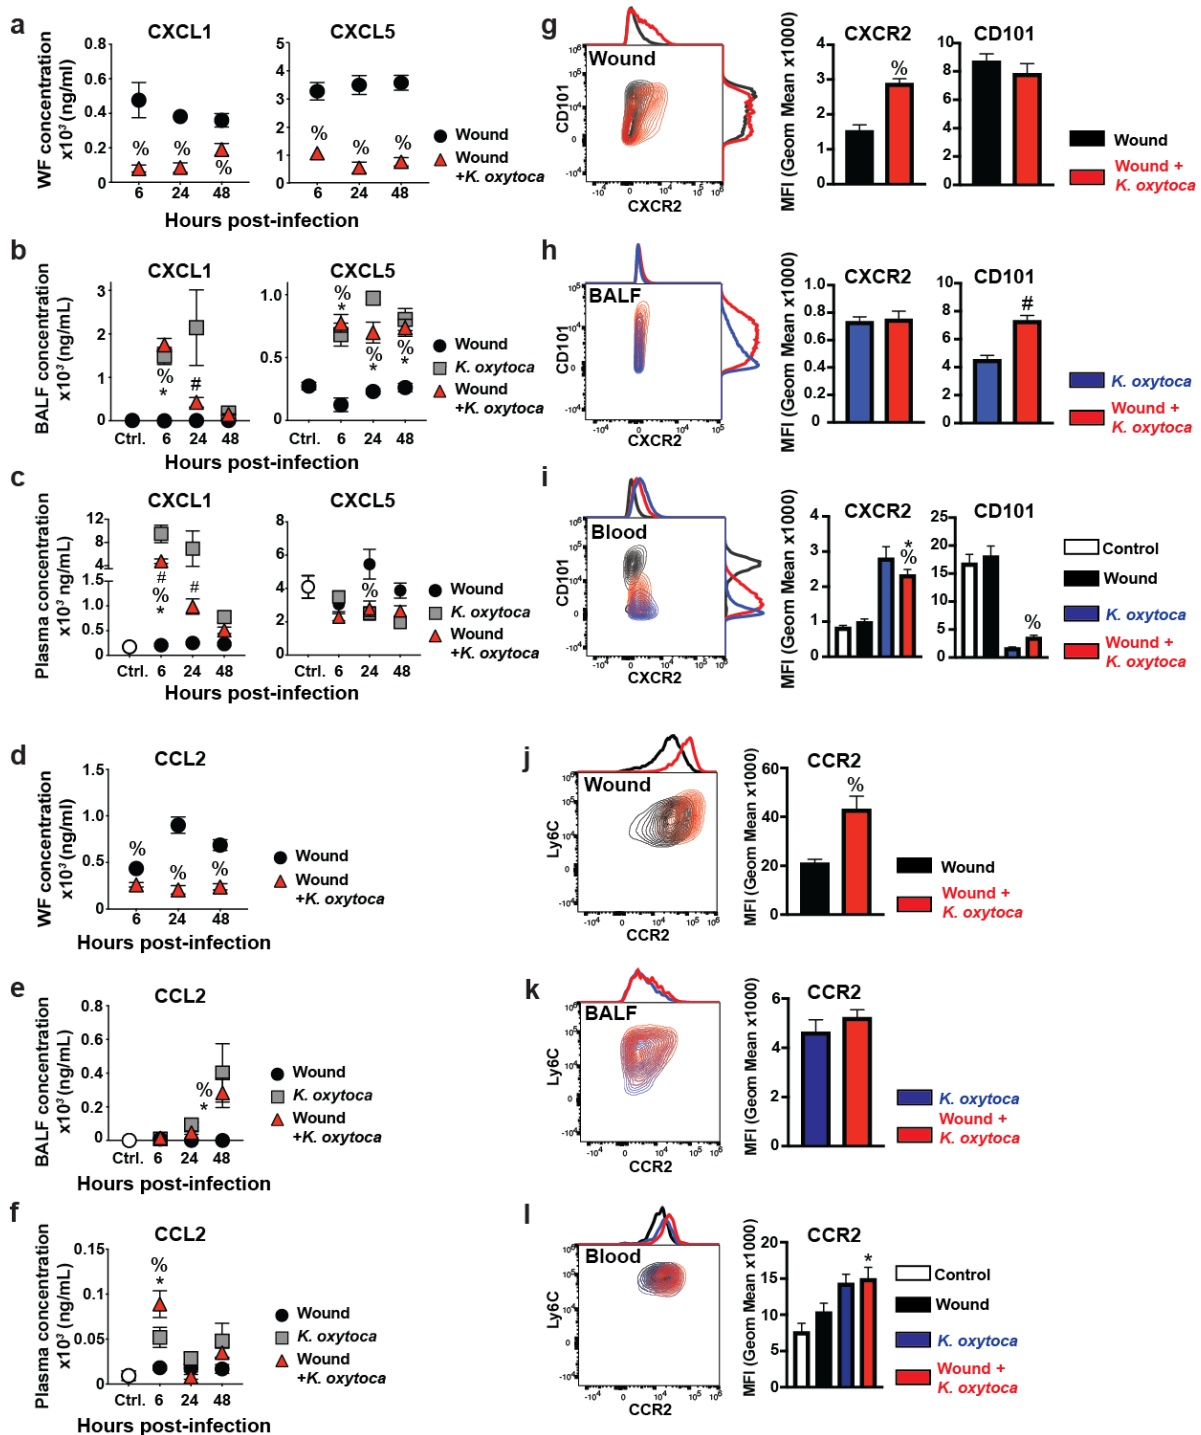

**Fig. 5. Wounds and pulmonary infection disrupt local and systemic chemokine responses.** C57BL/6J mice were wounded by PVA sponge implantation (wound) and a cohort was infected 5 days later with *K. oxytoca* (wound + *K. oxytoca*). Additional unwounded mice remained uninfected (ctrl.) or were infected with *K. oxytoca* (*K. oxytoca*).

**a-c)** A time course of CXCL1 and CXCL5 was determined in the wound fluid (WF) (a), BALF (b), and plasma (c) by ELISA.

**d-f)** A time course of CCL2 was determined in the wound fluid (d), BALF (e), and plasma (f) by LegendPlex assay.

**g-i)** Expression of CD101 and CXCR2 was determined on neutrophils isolated from the wound (g), BALF (h), and blood (i) by flow cytometry analysis.

**j-l)** Expression of CCR2 was determined on monocytes isolated from the wound (j), BALF (k), and blood (l) by flow cytometry analysis. Data are shown as the mean±SEM with a minimum n=7 mice per group from at least two independent experiments. Results are considered statistically significant when  $p \leq 0.05$ . Statistically significant changes between control and wound + *K. oxytoca* are denoted by \*, between wound and wound + *K. oxytoca* are denoted by %, and between *K. oxytoca* and wound + *K. oxytoca* are denoted by #.

495 wounds of wound + *K. oxytoca* mice had significantly higher expression of CXCR2, while their  
496 baseline high CD101 status was not altered, compared to wounded mice alone (Figure 5g). In  
497 contrast, CXCR2 expression on BALF neutrophils was not impacted by the presence of a wound;  
498 however, the presence of a wound led to slightly increased expression of CD101 (Figure 5h). To  
499 understand whether these changes originated from systemic effects, blood neutrophils were also  
500 examined. Blood neutrophils isolated from wounded mice were primarily CXCR2<sup>low</sup>CD101<sup>hi</sup>. In  
501 contrast, in infected mice, blood neutrophils had higher CXCR2 and lower CD101 expression.  
502 Blood neutrophils from wound + *K. oxytoca* mice resembled those from infected mice alone,  
503 although expression of both markers trended toward an intermediate phenotype (Figure 5i). Thus,  
504 infection drove the increased CXCR2 expression seen in the wounds of infected mice, while the  
505 presence of a wound caused slightly elevated CD101 expression on blood neutrophils, which was  
506 also evident in the BALF.

507  
508 Monocytes were similarly examined for changes in the expression of CCR2, the receptor for  
509 CCL2, to determine whether this could contribute to their impaired migration to the wounds of  
510 infected mice. Inflammatory monocytes isolated from the wounds of infected mice demonstrated  
511 a greater than two-fold increase in their expression of CCR2 compared to wounded mice alone  
512 (Figure 5j). In contrast, in the BALF of infected mice, CCR2 expression on monocytes was not  
513 affected by prior wounding (Figure 5k). Systemically, infection led to an increase in CCR2  
514 expression on circulating monocytes (Figure 5l), which was reflected in the wound monocyte  
515 compartment in wound + *K. oxytoca* mice. Interestingly, in this group, the CCR2 MFI of wound  
516 monocytes was nearly three-fold higher than that measured on blood monocytes. This trend was  
517 also observed in neutrophil CXCR2 expression, albeit it to a lesser degree. These data suggest that  
518 leukocytes with higher chemokine receptor expression are selectively recruited to the chemokine-  
519 poor environment, or that a lack of negative feedback prevents their downregulation. Taken  
520 together, these data demonstrate that pulmonary infection and wound healing responses drive  
521 unique systemic changes in the expression of chemokines and their receptors, which have  
522 consequences at the tissue level.

523

524

525

526

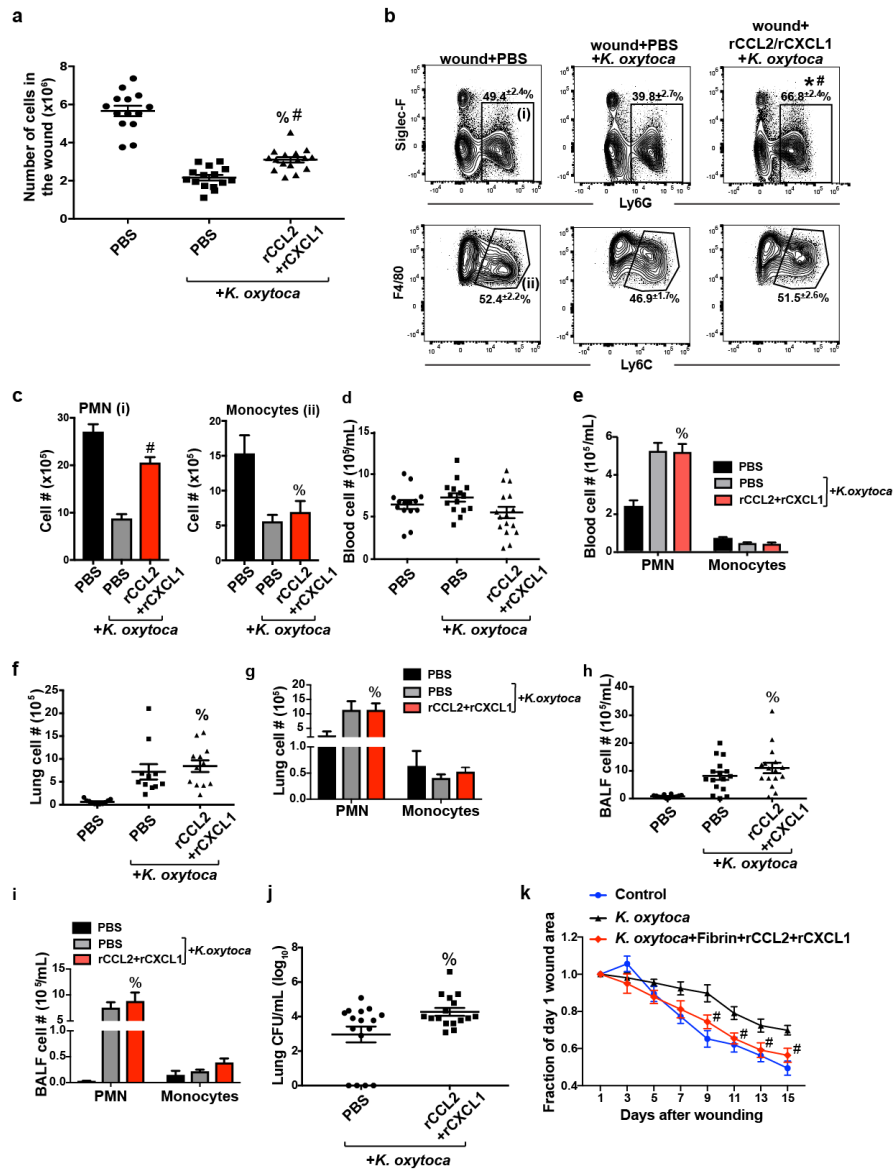

**Fig. 6. Addition of exogenous CCL2 and CXCL1 to wounds improves healing at the expense of pulmonary resistance to *K. oxytoca* infection.** Mice with PVA sponge wounds were uninfected or infected with *K. oxytoca* five days later. Sponges in infected mice were injected with PBS vehicle or recombinant CCL2+CXCL1 at the time of infection and 24h post-infection.

**a)** Wound and blood cellularity was determined 48h post-infection.

**b-c)** The effect of chemokine administration on the percentage (b) and absolute number (c) of wound Ly6G<sup>+</sup> neutrophils and F4/80<sup>+</sup>Ly6C<sup>hi</sup> monocytes was determined by flow cytometry analysis at 48h post-infection.

**d-e)** The effect of wound chemokine treatments on blood cellularity is shown in (d) and the number of blood neutrophils and inflammatory monocytes is shown in (e) at 48h post-infection.

**f-g)** The cellularity of the lung tissue (f), the number of lung Ly6G<sup>+</sup> neutrophils and F4/80<sup>+</sup>Ly6C<sup>hi</sup> monocytes (g) was determined at 48h post-infection.

**h-i)** The cellularity of the BALF (h) and number of BALF Ly6G<sup>+</sup> neutrophils and F4/80<sup>+</sup>Ly6C<sup>hi</sup> monocytes (i) was determined in mice at 48h post-infection.

**j)** The effect of wound chemokine treatments on lung bacterial burden at 48h post-infection was determined by CFU analysis.

**k)** Excisional tail wounds were performed on C57BL/6J mice. One cohort of wounded mice remained uninfected (control) and a cohort was infected with *K. oxytoca*. A mixture of recombinant CCL2 and CXCL1 was applied to the wound beds of a subset of *K. oxytoca*-infected mice using a fibrin vehicle (*K. oxytoca*+Fibrin+rCCL2+rCXCL1). The area of the tail wound was measured to determine the effect of chemokine application on the rate of wound closure.

Data are shown as the mean $\pm$ SEM with minimum n=12 mice per group from three independent experiments. Results are considered statistically significant when  $p \leq 0.05$ . In (a-j), % indicates a statistically significant change between wound + PBS and wound + rCCL2/rCXCL2 + *K. oxytoca*, and # indicates a statistically significant change between wound + PBS + *K. oxytoca* and wound + rCCL2/rCXCL2 + *K. oxytoca*. In (k), # denotes a statistically significant change between *K. oxytoca* and rCCL2/rCXCL2 + *K. oxytoca*.



527 **Restoring innate immune cell trafficking to wounds with exogenous CCL2 and CXCL1**  
528 **rescues wound healing.**

529  
530 Given the reduction in monocyte and neutrophil trafficking to the wounds of wound + *K. oxytoca*  
531 mice, we hypothesized that restoring trafficking would improve wound healing responses in these  
532 mice. To examine the effect of CCL2 and CXCL1 administration on wound innate leukocyte  
533 responses, the PVA sponge implantation model was used. Mice were wounded and/or infected as  
534 described above (Figure 1c). Recombinant CCL2 and recombinant CXCL1 were mixed and  
535 injected into each implanted sponge of wound + *K. oxytoca* mice at the time of infection and again  
536 24 hours post-infection. An additional cohort of wound + *K. oxytoca* mice, as well as uninfected  
537 mice, received PBS vehicle injections in the implanted sponges. CCL2 and CXCL1 treatment  
538 increased the wound cellularity of wound + *K. oxytoca* mice at 48 hours post-infection, compared  
539 to wound + *K. oxytoca* mice treated with PBS (Figure 6a). The frequency and number of  
540 neutrophils was significantly increased in wound + *K. oxytoca* mice with the addition of exogenous  
541 chemokines, while the number of monocytes was not significantly influenced despite the addition  
542 of the monocyte chemoattractant CCL2 (Figure 6b and 6c). Wound chemokine treatments did not  
543 affect the number of circulating, lung tissue, or BALF cells, including neutrophils and monocytes  
544 (Figure 6d-i). Bacterial titers were elevated in the infected mice that received wound chemokine  
545 treatments (Figure 6j), indicating that the redirection of neutrophil trafficking towards the wound  
546 had a detrimental effect on pulmonary bacterial resistance.

547  
548 To determine whether the addition of exogenous chemokines could improve the rate of wound  
549 healing, recombinant CCL2 and CXCL1 were delivered to the tail wounds of *K. oxytoca*-infected  
550 mice using a topical fibrin sealant. Recombinant CCL2 and CXCL1 were mixed and incorporated  
551 into the fibrin sealant prior to application. Fibrinolysis of the sealant by wound site proteases  
552 delivers the incorporated chemokines to the wound bed. The wounds of uninfected mice were left  
553 untreated (control) or were treated with fibrin sealant. A subset of tail-wounded mice was infected  
554 with *K. oxytoca* on wound day 1. The wound beds of tail wound + *K. oxytoca* mice were untreated,  
555 treated with fibrin sealant, or treated with fibrin sealant containing recombinant CCL2 and  
556 recombinant CXCL1. Treatments were applied every day from wound days 1 to 7, then every other  
557 day from days 9 to 15. *K. oxytoca*-infected mice had the slowest healing tail skin wounds (Figure

558 6k). Application of fibrin sealant to the tail skin wounds of control and *K. oxytoca*-infected mice  
559 did not significantly affect the rate of healing (Figure S8). However, treatment of tail skin wounds  
560 with fibrin supplemented with recombinant CCL2 and recombinant CXCL1 restored the rate of  
561 healing in *K. oxytoca*-infected mice to that of the control group (Figure 6k). Together, these data  
562 indicate that chemokine-mediated signals regulate innate leukocyte recruitment to the site of  
563 wounding and the rate of tail skin wound closure.

564

## 565 **Discussion**

566

567 This work investigated the concept of innate immune prioritization of inflammatory sites, which  
568 is essential in the full understanding of the innate immune response given its multiple roles in  
569 health and disease. Building upon previous work, which demonstrated that pulmonary infection  
570 with influenza A virus in mice suppresses wound healing in the skin (30), the current work  
571 identifies the mechanisms underlying impaired wound healing in mice with bacterial pulmonary  
572 infection. We show that post-operative human patients with pneumonia had decreased wound  
573 healing, as indicated by an increased rate of dehiscence. Innate leukocytes are critical to the repair  
574 of injured tissue and to the early control of pulmonary infection, so to investigate the role played  
575 by the innate immune system, we developed a murine model of post-operative pulmonary  
576 infection. In this model, the innate immune response is faced with two distal and competing  
577 inflammatory insults: one in the skin and one in the lung. There is considerable overlap in the  
578 cellular and cytokine responses that orchestrate acute wound healing and the pulmonary response  
579 to bacterial infection (11-13, 15-17, 20, 21, 28, 36, 43-51); therefore, we hypothesized that one  
580 inflammatory site would more strongly recruit innate leukocytes, and thus take priority over the  
581 other in a concept we call “innate immune triage.”

582

583 It has been shown in other systems that disruption of innate immune cellular responses can alter  
584 or delay wound healing (9, 12, 13, 15, 16, 18, 43). In murine models, as we observed in our patient  
585 data, the pulmonary response to bacterial infection was prioritized at the expense of cutaneous  
586 wound healing. Our data demonstrated that the healing rate of excisional tail wounds was delayed  
587 following the onset of pulmonary *K. oxytoca* infection. Examining the cellular mechanisms of  
588 impaired healing, we determined that chemokine levels in PVA sponge wounds of infected mice

589 dropped as early as 6 hours post-infection, before any observed decline in wound cellularity. This  
590 suggests that wound chemokines are actively suppressed by signals from the infected lung. This  
591 dip in chemokine levels was followed by greatly reduced wound cellularity and cytokine  
592 concentrations. The loss of wound cellularity was attributed primarily to a decrease in neutrophils  
593 and inflammatory monocytes. These leukocytes migrate from the blood to the wound site, where  
594 they clear injured tissue debris, coordinate inflammatory responses, and, in the case of monocytes,  
595 differentiate into wound macrophages to drive repair responses (12, 15, 20). Adoptive transfer  
596 experiments demonstrated that a decrease in leukocyte migration contributed to the loss of  
597 monocytes and neutrophils in the wounds of infected mice. These findings are consistent with  
598 studies that show blocking the early acute cellular responses to wounding disrupts the later stages  
599 of healing (9, 13, 14, 17, 43).

600  
601 It has been reported that injury or infection can induce systemic immunosuppression, which we  
602 hypothesized could contribute to the impaired wound healing that occurred in mice with  
603 pulmonary bacterial infection (26, 27, 52, 53). Evidence of this was seen in the delayed expression  
604 of TNF- $\alpha$  and CXCL1 in the plasma of wound + *K. oxytoca* mice compared to infected mice alone.  
605 TNF- $\alpha$  has coordinated expression with many chemokines, including CXCL1, suggesting that the  
606 deficit in these factors may be linked (54-57). A similar trend in TNF- $\alpha$  and CXCL1 induction was  
607 observed in the BALF, indicating that the systemic effect was driven by a transient suppression of  
608 local lung cytokine and chemokine signaling. Surprisingly, the suppressive effect of wounding on  
609 BALF cytokine and chemokine levels during *K. oxytoca* infection did not have an overtly  
610 detrimental effect on BALF cellularity or the control of bacterial infection. Perhaps this is due to  
611 high vascularization in the lung (58), permitting even low levels of chemokines to attract an  
612 adequate number of cells to respond to infection. This is likely why wound + *K. oxytoca* mice were  
613 able to mediate early control over *K. oxytoca* infection at the time points examined. These results  
614 are in contrast to what has been reported in cases of severe trauma, which can cause immune  
615 dysfunction and impaired pulmonary immune responses, thereby increasing the risk of developing  
616 secondary lung infection (2, 27, 59). The wound models implemented in this study do not generate  
617 a strong or sustained systemic inflammatory response and do not recapitulate trauma-induced  
618 immune suppression, which is consistent with the lack of effect on the pulmonary antibacterial  
619 response in wound + *K. oxytoca* mice.

620

621 Despite the transient depression in systemic cytokine and chemokine signaling, wounding  
622 bolstered blood cellularity in both uninfected and infected mice. In particular, there were twice as  
623 many circulating neutrophils in wound + *K. oxytoca* mice compared to other treatment groups.  
624 Despite the surplus of circulating neutrophils, the wounds of wound + *K. oxytoca* mice had very  
625 few neutrophils compared to the wounds of uninfected mice. This indicates that a lack of neutrophil  
626 chemotactic signal from the wound site was responsible for the decreased number of wound  
627 neutrophils in wound + *K. oxytoca* mice. In contrast, the number of circulating Ly6C<sup>hi</sup> monocytes  
628 was lowest in wound + *K. oxytoca* mice, so the decrease in wound monocyte number in *K. oxytoca*-  
629 infected mice may reflect both a decrease in the circulating supply and a loss of chemotactic signal  
630 from the wound. Furthermore, it was found that mice with competing inflammation in the skin and  
631 lung had a unique phenotype regarding the distribution of cells in the bone marrow and blood, as  
632 well as the activation state of these cells, which may also contribute to functional changes in the  
633 tissue.

634

635 We hypothesized that redirecting neutrophil and monocyte trafficking to the wounds of wound +  
636 *K. oxytoca* mice would improve healing. Serial application of recombinant CCL2 and CXCL1 to  
637 excisional tail skin wounds accelerated the rate of wound closure in *K. oxytoca*-infected mice to  
638 that of uninfected mice. Injection of recombinant CCL2 and CXCL1 into PVA sponge wounds  
639 improved wound cellularity in wound + *K. oxytoca* mice through an increase in neutrophils.  
640 Neutrophils were the predominant circulating leukocyte population in infected mice, and this is  
641 likely why they were preferentially recruited to chemokine-treated wounds. Interestingly, wound  
642 + *K. oxytoca* mice that received wound chemokine treatments showed a slight impairment in  
643 bacterial clearance in the lungs, indicating that the redistribution of neutrophils to the wound  
644 altered pulmonary resistance to bacterial infection. Surprisingly there was not a decrease in the  
645 overall cellularity of the lung or BALF, including neutrophils and monocytes; the reason for this  
646 loss of resistance to bacterial infection will require further investigation but was perhaps driven by  
647 impaired activation or bactericidal activity of the cells. Given the growing appreciation of  
648 neutrophil heterogeneity linked to function, the finding that neutrophils in wound + *K. oxytoca*  
649 mice display altered phenotypes systemically and locally support this concept (60).

650

651 This work provides insight into how the innate immune response is equipped to handle  
652 simultaneous distal inflammatory insults. Clinical data suggested that surgical patients who  
653 acquire pneumonia do not heal as well. This is important because delayed wound healing leaves  
654 patients susceptible to a variety of complications, including wound infection or systemic secondary  
655 infections (2, 26), hernias, debilitating scar tissue formation (61), permanent disablement, and  
656 increased mortality (62, 63). Furthermore, the treatment of poorly healing wounds presents a major  
657 economic burden to society and the healthcare system (64, 65). Modeling this situation in mice,  
658 we found that the innate immune response can indeed prioritize its response to one inflammatory  
659 site over another. Pulmonary infection drove a rapid and dramatic suppression of chemokine  
660 signals in the wound, which manifested in a breakdown of early acute wound healing responses  
661 mediated by the innate immune response. Additionally, this study demonstrates how competing  
662 inflammatory insults drive unique phenotypes in circulating leukocytes, which may be linked to  
663 functional deficits in downstream tissue responses. Treating wounds with chemokines improved  
664 healing, but this occurred at the expense of bacterial clearance in the lung. These findings  
665 demonstrate that distal inflammatory insults compete for innate immune cellular resources, and  
666 prioritization of the immune response towards one inflamed site over the other is dictated by  
667 chemokine-mediated signals. With the immune response directed towards the lungs, poorly  
668 healing wounds in patients with hospital-acquired pneumonia may contribute to their increased  
669 morbidity. This study introduces the potential of using chemokine-based treatments to manipulate  
670 the prioritization of innate leukocyte responses to improve wound healing in high-risk patient  
671 populations. Overall, this work provides a mechanistic understanding of innate immune function  
672 in complex inflammatory contexts, which has broad implications in cases of clinical comorbidities  
673 and in understanding immune responses in a systemic context.

674

675

676 **References**

- 677 1. L. C. Rankin, D. Artis, Beyond Host Defense: Emerging Functions of the Immune System  
678 in Regulating Complex Tissue Physiology. **173**, 554–567 (2018).
- 679 2. M. Huber-Lang, J. D. Lambris, P. A. Ward, Innate immune responses to trauma. *Nature*  
680 *Immunology*. **19**, 327–341 (2018).
- 681 3. A. K. Palucka, L. M. Coussens, The Basis of Oncoimmunology. **164**, 1233–1247 (2016).
- 682 4. L. J. Yockey, A. Iwasaki, Interferons and Proinflammatory Cytokines in Pregnancy and  
683 Fetal Development. *Immunity*. **49**, 397–412 (2018).
- 684 5. R. Medzhitov, D. S. Schneider, M. P. Soares, Disease tolerance as a defense strategy.  
685 *Science*. **335**, 936–941 (2012).
- 686 6. M. Ferrer, A. Torres, Epidemiology of ICU-acquired pneumonia. *Curr Opin Crit Care*.  
687 **24**, 325–331 (2018).
- 688 7. O. Gundel *et al.*, Timing of surgical site infection and pulmonary complications after  
689 laparotomy. *Int J Surg*. **52**, 56–60 (2018).
- 690 8. K. K. Giuliano, D. Baker, B. Quinn, The epidemiology of nonventilator hospital-acquired  
691 pneumonia in the United States. *Am J Infect Control*. **46**, 322–327 (2018).
- 692 9. L. A. DiPietro, M. Burdick, Q. E. Low, S. L. Kunkel, R. M. Strieter, MIP-1alpha as a  
693 critical macrophage chemoattractant in murine wound repair. **101**, 1693–1698 (1998).
- 694 10. J. M. Daley *et al.*, Modulation of macrophage phenotype by soluble product(s) released  
695 from neutrophils. **174**, 2265–2272 (2005).
- 696 11. J. M. Daley, S. K. Brancato, A. A. Thomay, J. S. Reichner, J. E. Albina, The phenotype of  
697 murine wound macrophages. **87**, 59–67 (2010).
- 698 12. T. Lucas *et al.*, Differential roles of macrophages in diverse phases of skin repair. *The*  
699 *Journal of Immunology*. **184**, 3964–3977 (2010).
- 700 13. R. Mirza, L. A. DiPietro, T. J. Koh, Selective and specific macrophage ablation is  
701 detrimental to wound healing in mice. *The American Journal of Pathology*. **175**, 2454–  
702 2462 (2009).
- 703 14. Q. E. Low *et al.*, Wound healing in MIP-1alpha(-/-) and MCP-1(-/-) mice. *The American*  
704 *Journal of Pathology*. **159**, 457–463 (2001).
- 705 15. S. K. Brancato, J. E. Albina, Wound macrophages as key regulators of repair: origin,  
706 phenotype, and function. *The American Journal of Pathology*. **178**, 19–25 (2011).

- 707 16. S. K. Brancato *et al.*, Toll-like receptor 4 signaling regulates the acute local inflammatory  
708 response to injury and the fibrosis/neovascularization of sterile wounds. *Wound Repair*  
709 *Regen.* **21**, 624–633 (2013).
- 710 17. L. He, A. G. Marneros, Macrophages are essential for the early wound healing response  
711 and the formation of a fibrovascular scar. *The American Journal of Pathology.* **182**, 2407–  
712 2417 (2013).
- 713 18. M. L. Novak, T. J. Koh, Phenotypic transitions of macrophages orchestrate tissue repair.  
714 *The American Journal of Pathology.* **183**, 1352–1363 (2013).
- 715 19. M.-H. Kim *et al.*, Catecholamine stress alters neutrophil trafficking and impairs wound  
716 healing by  $\beta$ 2-adrenergic receptor-mediated upregulation of IL-6. *J. Invest. Dermatol.*  
717 **134**, 809–817 (2014).
- 718 20. M. J. Crane *et al.*, The monocyte to macrophage transition in the murine sterile wound.  
719 *PLoS ONE.* **9**, e86660 (2014).
- 720 21. R. E. Mirza, T. J. Koh, Contributions of cell subsets to cytokine production during normal  
721 and impaired wound healing. *CYTOKINE.* **71**, 409–412 (2015).
- 722 22. K. Vaddi, R. C. Newton, Regulation of monocyte integrin expression by beta-family  
723 chemokines. *J. Immunol.* **153**, 4721–4732 (1994).
- 724 23. K. Rzeniewicz *et al.*, L-selectin shedding is activated specifically within transmigrating  
725 pseudopods of monocytes to regulate cell polarity in vitro. *Proceedings of the National*  
726 *Academy of Sciences.* **112**, E1461–70 (2015).
- 727 24. M. Rodrigues, N. Kosaric, C. A. Bonham, G. C. Gurtner, Wound Healing: A Cellular  
728 Perspective. *Physiological Reviews.* **99**, 665–706 (2019).
- 729 25. J.-L. Vincent, Nosocomial infections in adult intensive-care units. *Lancet.* **361**, 2068–2077  
730 (2003).
- 731 26. M. K. Angele, E. Faist, Clinical review: immunodepression in the surgical patient and  
732 increased susceptibility to infection. **6**, 298–305 (2002).
- 733 27. T. Hensler *et al.*, Distinct mechanisms of immunosuppression as a consequence of major  
734 surgery. *Infect. Immun.* **65**, 2283–2291 (1997).
- 735 28. M. A. Jonker, J. L. Hermsen, F. E. Gomez, Y. Sano, K. A. Kudsk, Injury induces localized  
736 airway increases in pro-inflammatory cytokines in humans and mice. **12**, 49–56 (2011).
- 737 29. M. A. Jonker, Y. Sano, J. L. Hermsen, J. Lan, K. A. Kudsk, Proinflammatory cytokine  
738 surge after injury stimulates an airway immunoglobulin a increase. *J Trauma.* **69**, 843–  
739 848 (2010).

- 740 30. M. J. Crane *et al.*, Pulmonary influenza A virus infection leads to suppression of the  
741 innate immune response to dermal injury. **14**, e1007212 (2018).
- 742 31. V. Falanga *et al.*, Full-thickness wounding of the mouse tail as a model for delayed wound  
743 healing: accelerated wound closure in Smad3 knock-out mice. *Wound Repair Regen.* **12**,  
744 320–326 (2004).
- 745 32. V. Falanga *et al.*, Autologous bone marrow-derived cultured mesenchymal stem cells  
746 delivered in a fibrin spray accelerate healing in murine and human cutaneous wounds.  
747 *Tissue Eng.* **13**, 1299–1312 (2007).
- 748 33. M. J. Crane, W. L. Henry, H. L. Tran, J. E. Albina, A. M. Jamieson, Assessment of Acute  
749 Wound Healing using the Dorsal Subcutaneous Polyvinyl Alcohol Sponge Implantation  
750 and Excisional Tail Skin Wound Models. *J Vis Exp* (2020), doi:10.3791/60653.
- 751 34. K. M. Lee *et al.*, Coinfection With Influenza A Virus and *Klebsiella oxytoca*: An  
752 Underrecognized Impact on Host Resistance and Tolerance to Pulmonary Infections.  
753 *Front. Immunol.* **9**, 2377 (2018).
- 754 35. K. A. T. Herzog *et al.*, Genotypes of *Klebsiella oxytoca* isolates from patients with  
755 nosocomial pneumonia are distinct from those of isolates from patients with antibiotic-  
756 associated hemorrhagic colitis. *J. Clin. Microbiol.* **52**, 1607–1616 (2014).
- 757 36. A. A. Thomay *et al.*, Disruption of interleukin-1 signaling improves the quality of wound  
758 healing. *The American Journal of Pathology.* **174**, 2129–2136 (2009).
- 759 37. M. J. Crane *et al.*, The monocyte to macrophage transition in the murine sterile wound.  
760 *PLoS ONE.* **9**, e86660 (2014).
- 761 38. M. J. Crane, K. L. Hokeness-Antonelli, T. P. Salazar-Mather, Regulation of inflammatory  
762 monocyte/macrophage recruitment from the bone marrow during murine cytomegalovirus  
763 infection: role for type I interferons in localized induction of CCR2 ligands. **183**, 2810–  
764 2817 (2009).
- 765 39. A. Fuchs *et al.*, Trauma Induces Emergency Hematopoiesis through IL-1/MyD88-  
766 Dependent Production of G-CSF. *The Journal of Immunology.* **202**, 3020–3032 (2019).
- 767 40. L. G. Ng, R. Ostuni, A. Hidalgo, Heterogeneity of neutrophils. *Nat Rev Immunol.* **19**, 255–  
768 265 (2019).
- 769 41. J. Mei *et al.*, *Cxcr2* and *Cxcl5* regulate the IL-17/G-CSF axis and neutrophil homeostasis  
770 in mice. *J. Clin. Invest.* **122**, 974–986 (2012).
- 771 42. C. L. Sokol, A. D. Luster, The chemokine system in innate immunity. *Cold Spring Harb*  
772 *Perspect Biol.* **7** (2015), doi:10.1101/cshperspect.a016303.
- 773 43. J. S. Duffield *et al.*, Selective depletion of macrophages reveals distinct, opposing roles  
774 during liver injury and repair. **115**, 56–65 (2005).



- 775 44. P. A. Manderscheid *et al.*, Bacterial clearance and cytokine profiles in a murine model of  
776 postsurgical nosocomial pneumonia. *Clin. Diagn. Lab. Immunol.* **11**, 742–751 (2004).
- 777 45. M. A. Olszewski *et al.*, Effect of laparotomy on clearance and cytokine induction in  
778 *Staphylococcus aureus* infected lungs. *Am. J. Respir. Crit. Care Med.* **176**, 921–929  
779 (2007).
- 780 46. A. Craig, J. Mai, S. Cai, S. Jeyaseelan, Neutrophil recruitment to the lungs during  
781 bacterial pneumonia. **77**, 568–575 (2009).
- 782 47. J. Mei *et al.*, CXCL5 regulates chemokine scavenging and pulmonary host defense to  
783 bacterial infection. *Immunity.* **33**, 106–117 (2010).
- 784 48. K. Yamamoto *et al.*, Roles of lung epithelium in neutrophil recruitment during  
785 pneumococcal pneumonia. *Am. J. Respir. Cell Mol. Biol.* **50**, 253–262 (2014).
- 786 49. J. Bordon *et al.*, Understanding the roles of cytokines and neutrophil activity and  
787 neutrophil apoptosis in the protective versus deleterious inflammatory response in  
788 pneumonia. *Int. J. Infect. Dis.* **17**, e76–83 (2013).
- 789 50. A. M. Jamieson *et al.*, Role of tissue protection in lethal respiratory viral-bacterial  
790 coinfection. *Science.* **340**, 1230–1234 (2013).
- 791 51. L. J. Quinton, J. P. Mizgerd, Dynamics of lung defense in pneumonia: resistance,  
792 resilience, and remodeling. *Annu. Rev. Physiol.* **77**, 407–430 (2015).
- 793 52. A. M. Jamieson, S. Yu, C. H. Annicelli, R. Medzhitov, Influenza Virus-Induced  
794 Glucocorticoids Compromise Innate Host Defense against a Secondary Bacterial  
795 Infection. *Cell Host & Microbe.* **7**, 103–114 (2010).
- 796 53. N. Ding *et al.*, Role of p38 mitogen-activated protein kinase in posttraumatic  
797 immunosuppression in mice. *J Trauma Acute Care Surg.* **73**, 861–868 (2012).
- 798 54. S. M. Vieira *et al.*, A crucial role for TNF- $\alpha$  in mediating neutrophil influx induced by  
799 endogenously generated or exogenous chemokines, KC/CXCL1 and LIX/CXCL5. *Br. J.*  
800 *Pharmacol.* **158**, 779–789 (2009).
- 801 55. L. Yao *et al.*, Elevated CXCL1 expression in gp130-deficient endothelial cells impairs  
802 neutrophil migration in mice. *Blood.* **122**, 3832–3842 (2013).
- 803 56. J.-M. Shieh, Y.-J. Tsai, C.-J. Tsou, W.-B. Wu, CXCL1 regulation in human pulmonary  
804 epithelial cells by tumor necrosis factor. *Cell. Physiol. Biochem.* **34**, 1373–1384 (2014).
- 805 57. H.-M. Lo, T.-H. Lai, C.-H. Li, W.-B. Wu, TNF- $\alpha$  induces CXCL1 chemokine expression  
806 and release in human vascular endothelial cells in vitro via two distinct signaling  
807 pathways. *Acta Pharmacol. Sin.* **35**, 339–350 (2014).

- 808 58. K. Suresh, L. A. Shimoda, *Lung Circulation* (John Wiley & Sons, Inc., Hoboken, NJ,  
809 USA, 2011), vol. 570.
- 810 59. S. Wutzler *et al.*, Pneumonia in severely injured patients with thoracic trauma: results of a  
811 retrospective observational multi-centre study. *Scand J Trauma Resusc Emerg Med.* **27**,  
812 31 (2019).
- 813 60. S. M. Chatfield, N. Thieblemont, V. Witko-Sarsat, Expanding Neutrophil Horizons: New  
814 Concepts in Inflammation. *J Innate Immun.* **10**, 422–431 (2018).
- 815 61. C. D. Marshall *et al.*, Cutaneous Scarring: Basic Science, Current Treatments, and Future  
816 Directions. *Advances in Wound Care.* **7**, 29–45 (2018).
- 817 62. J. M. Lord *et al.*, The systemic immune response to trauma: an overview of  
818 pathophysiology and treatment. *Lancet.* **384**, 1455–1465 (2014).
- 819 63. L. Gould *et al.*, (2015), vol. 63, pp. 427–438.
- 820 64. C. K. Sen *et al.*, Human skin wounds: a major and snowballing threat to public health and  
821 the economy. *Wound Repair Regen.* **17**, 763–771 (2009).
- 822 65. S. R. Nussbaum *et al.*, An Economic Evaluation of the Impact, Cost, and Medicare Policy  
823 Implications of Chronic Nonhealing Wounds. **21**, 27–32 (2018).

824

## 825 **Acknowledgments:**

826 The authors would like to thank Christine Biron and Kayla Campbell for helpful discussions,  
827 commentary, and editorial assistance on the manuscript, as well as Kevin Carlson and the Brown  
828 University Flow Cytometry and Sorting Facility for valuable flow cytometry consultation and  
829 assistance. **Funding:** Brown University Dean’s Emerging Areas of New Science Award, Defense  
830 Advanced Research Projects Agency (DARPA) YFA15 D15AP00100, NIGMS COBRE Award  
831 P20GM109035, and National Heart Lung Blood Institute (NHLBI) 1R01HL126887-01A1  
832 (A.M.J). NIH P20GM103652 (S.F.M.) and C. James Carrico, MD, FACS, Faculty Research  
833 Fellowship for the Study of Trauma and Critical Care from the American College of Surgeons  
834 (S.F.M). **Author contributions:** M.J.C. designed the experiments, performed most of the  
835 experiments, and wrote the paper, Y.X. designed the experiments and performed most of the  
836 experiments, S.F.M. and B.M.H. obtained and analyzed the NSQIP data, J.E.A. designed the  
837 experiments, W.L.H. performed the mouse surgeries and assisted in other experiments, H.L.T.,  
838 K.R.P.C, A.R.D.J, and L.C. assisted with experiments, A.M.J designed the study, designed the  
839 experiments, and wrote the paper. **Competing interests:** The authors declare no financial

840 competing interests. **Data and materials availability:** All relevant data is included in the  
841 manuscript and supplementary data. Materials will be made available upon request.
